1 **Ancient methicillin-resistant *Staphylococcus aureus*: expanding current knowledge using**  
2 **molecular epidemiological characterization of a Swiss legacy collection**

3  
4 Vanni Benvenga<sup>1,2</sup>, Aline Cuénod<sup>1,2</sup>, Srinithi Purushothaman<sup>1,2</sup>, Gottfried Dasen<sup>3</sup>, Maja Weisser<sup>4</sup>,  
5 Stefano Bassetti<sup>5</sup>, Tim Roloff<sup>1,2,6,7</sup>, Martin Siegemund<sup>8</sup>, Ulrich Heininger<sup>9</sup>, Julia Bielicki<sup>9</sup>, Marianne  
6 Wehrli<sup>10</sup>, Paul Friderich<sup>11</sup>, Reno Frei<sup>7</sup>, Andreas Widmer<sup>4</sup>, Kathrin Herzog<sup>12</sup>, Hans Fankhauser<sup>13</sup>,  
7 Oliver Nolte<sup>14</sup>, Thomas Bodmer<sup>15</sup>, Martin Risch<sup>15</sup>, Olivier Dubuis<sup>16</sup>, Sigrid Pranghofer<sup>17</sup>, Romana  
8 Calligaris-Maibach<sup>18</sup>, Susanne Graf<sup>19</sup>, Sarah Tschudin-Sutter<sup>4</sup>, Vincent Perreten<sup>20,21</sup>, Helena M.B  
9 Seth-Smith<sup>1,2,6,7</sup>, Adrian Egli<sup>1,2,7,21</sup>

- 10  
11 <sup>1</sup> Applied Microbiology Research, Department of Biomedicine, University of Basel, Basel,  
12 Switzerland  
13 <sup>2</sup> Institute of Medical Microbiology, University of Zurich, Zurich, Switzerland  
14 <sup>3</sup> Culture Collection of Switzerland, Wädenswil, Switzerland  
15 <sup>4</sup> Infectious Diseases and Hospital Epidemiology, University Hospital Basel, Basel, Switzerland  
16 <sup>5</sup> Internal Medicine, University Hospital Basel, Basel, Switzerland  
17 <sup>6</sup> Swiss Institute of Bioinformatics, University of Basel, Basel, Switzerland  
18 <sup>7</sup> Clinical Bacteriology and Mycology, University Hospital Basel, Basel, Switzerland  
19 <sup>8</sup> Intensive Care Medicine, University Hospital Basel, Basel, Switzerland  
20 <sup>9</sup> Infectious Diseases and Hospital Epidemiology, University of Basel Children's Hospital, Basel,  
21 Switzerland  
22 <sup>10</sup> Microbiology Department, Hospital of Schaffhausen, Schaffhausen, Switzerland  
23 <sup>11</sup> Medicinal microbiology department, Hospital of Lucerne, Lucerne, Switzerland  
24 <sup>12</sup> Clinical Microbiology, Cantonal Hospital Thurgau, Münsterlingen, Switzerland  
25 <sup>13</sup> Clinical Microbiology, Cantonal Hospital Aarau, Aarau, Switzerland  
26 <sup>14</sup> Clinical Microbiology, Zentrum für Labormedizin St. Gallen, St. Gallen, Switzerland  
27 <sup>15</sup> Labor Risch, Bern, Switzerland  
28 <sup>16</sup> Clinical Microbiology, Viollier AG, Allschwil, Switzerland  
29 <sup>17</sup> Bioanalytica AG, Lucerne, Switzerland

- 30 <sup>18</sup> Clinical Microbiology, Cantonal Hospital Baden, Baden, Switzerland
- 31 <sup>19</sup> Clinical Microbiology, Cantonal Hospital Basellandschaft, Liestal, Switzerland
- 32 <sup>20</sup> Institute of Veterinary Bacteriology, University of Bern, Bern, Switzerland
- 33 <sup>21</sup> Swiss Pathogen Surveillance Platform (SPSP)
- 34
- 35 Short Title: Molecular epidemiology of ancient Swiss MRSA
- 36
- 37 Correspondence:
- 38 Prof. Adrian Egli, MD PhD
- 39 Director, Institute of Medical Microbiology
- 40 Gloriastrasse 28/30
- 41 University of Zurich
- 42 8006 Zurich, Switzerland
- 43 Email: [aegli@imm.uzh.ch](mailto:aegli@imm.uzh.ch)

## 44 Abstract

45 Few methicillin-resistant *Staphylococcus aureus* (MRSA) from the early years of its global  
46 emergence have been sequenced. Knowledge about evolutionary factors promoting the success  
47 of specific MRSA multi-locus sequence types (MLSTs) remains scarce. We aimed to characterize  
48 a legacy MRSA collection isolated from 1965 to 1987 and compare it against publicly available  
49 international and local genomes.

50 We accessed 451 ancient (1965-1987) Swiss MRSA isolates, stored in the Culture Collection of  
51 Switzerland. We determined phenotypic antimicrobial resistance (AMR) and performed Illumina  
52 short-read sequencing on all isolates and long-read sequencing on a selection with Oxford  
53 Nanopore Technology. For context, we included 103 publicly available international genomes  
54 from 1960 to 1992 and sequenced 1207 modern Swiss MRSA isolates from 2007 to 2022. We  
55 analyzed the core genome (cg)MLST and predicted SCC*mec* cassette types, AMR, and virulence  
56 genes.

57 Among the 451 ancient Swiss MRSA isolates, we found 17 sequence types (STs) of which 11  
58 have been previously described. Two STs were novel combinations of known loci and six isolates  
59 carried previously unsubmitted MLST alleles, representing five new STs (ST7843, ST7844,  
60 ST7837, ST7839, and ST7842). Most isolates (83% 376/451) represented ST247-MRSA-I  
61 isolated in the 1960s, followed by ST7844 (6% 25/451), a novel single locus variant (SLV) of  
62 ST239. Analysis by cgMLST indicated that isolates belonging to ST7844-MRSA-III cluster within  
63 the diversity of ST239-MRSA-III. Early MRSA were predominantly from clonal complex (CC) 8.  
64 From 1980 to the end of the 20<sup>th</sup> century we observed that CC22 and CC5 as well as CC8 were  
65 present, both locally and internationally.

66 The combined analysis of 1761 ancient and contemporary MRSA isolates across more than 50  
67 years uncovered novel STs and allowed us a glimpse into the lineage flux between Swiss and  
68 international MRSA across time.

69

70

## 71 Background

72 The introduction of penicillin during the 1930s and early 1940s was quickly followed by the rise of  
73 penicillin resistant *Staphylococcus aureus* due to penicillinase *blaZ* (1–3). Methicillin, a  
74 penicillinase-resistant antibiotic, was introduced in 1961, and within a year, the first methicillin  
75 resistant *S. aureus* (MRSA) isolate carrying the *mecA* gene emerged and established itself as a  
76 major nosocomial pathogen (4). The *mecA* gene is found on a mobile genetic element, the  
77 Staphylococcal Cassette Chromosome *mec* (SCC*mec*), of which different types have evolved,  
78 and which spreads via horizontal gene transfer (5). The acquisition of *mecA* has been dated back  
79 to the mid-1940s (6), and it is hypothesized that the SCC*mec* cassette originated from the *mecA*  
80 gene of *Staphylococcus fleurettii* and its surrounding chromosomal region (7). While one study  
81 advanced the hypothesis that the acquisition of the SCC*mec* cassette was a single evolutionary  
82 event (8), more recent studies supported the theory that MRSA emerged multiple times through  
83 independent events (9–11) and that cassette substitution can also occur, although far less  
84 frequently than cassette acquisition (12).

85 Molecular typing of MRSA isolates is a very important part of any local, national, and international  
86 epidemiology management strategy (13). Current unified MRSA clone nomenclature incorporates  
87 information on the genomic ancestry as multi-locus sequence typing (MLST), methicillin  
88 resistance status, and the SCC*mec* cassette type (e.g. ST250-MRSA-I or ST8-MSSA) (9).

89 The emergence of antibiotic-resistant *S. aureus* throughout the twentieth century can be roughly  
90 classified into four waves. First, the advent of penicillin resistance provided the first resistant *S.*  
91 *aureus* (1940-1960). Second came methicillin resistance, mostly linked to European hospitals  
92 (1960-1980), which spawned the term hospital-associated MRSA (HA-MRSA). In the third wave  
93 methicillin resistance spread worldwide (1980-1990). The fourth wave defines the rise of  
94 community-associated and livestock associated MRSA (CA-MRSA, LA-MRSA) (1990-2000) (14),  
95 coinciding with the development of resistance to ciprofloxacin and vancomycin (15,16). During  
96 this time, major clonal populations with specific STs emerged and disappeared through  
97 displacement by new, more successful epidemic clones (17). The first epidemic MRSA clone was

98 identified as ST250 in the 1960s, within clonal complex (CC) 8. It is hypothesized that it arose as  
99 a single locus variant (SLV) of ST8-MSSA, which then acquired the SCC*mec* type I (9) and spread  
100 throughout Europe. ST250-MRSA-I was subsequently replaced by its SLV ST247-MRSA-I, first  
101 in Denmark around 1964 (18) and then globally, gaining resistance to further antimicrobials (9).  
102 ST247-MRSA-I was later displaced in Europe by other successful lineages in the late 1990s.  
103 ST239-MRSA-III, which also evolved from ST8-MRSA-III (9), was first identified in Australian  
104 hospitals in 1979 (19). Subsequently it was found in Brazilian hospitals in 1992 (20) and competed  
105 with ST247-MRSA-I in Portuguese hospitals throughout the 1990s (21,22). Later in the century,  
106 ST8-MSSA also acquired resistance to methicillin: one of the most successful contemporary CA-  
107 MRSA, USA300, belongs to ST8 (23,24). US300 has become endemic in North America and is  
108 still finding niches to colonize around the globe, with repeated introductions of USA300 into  
109 Europe reported (25–29). ST22-MRSA-IV, another global lineage, has been reported in many  
110 countries since the 1990s. ST22-MRSA-IV became a dominant HA-MRSA in England (UK-  
111 EMRSA-15) (30–32), and by the year 2000 was responsible for 65% of British MRSA bacteremia  
112 episodes (33). ST5 is a pandemic lineage reported in Europe, Asia, and North America (31).  
113 Previous comparative WGS studies have highlighted a recent increase in MRSA diversity,  
114 combined with success in ecological niches (30,34). This success is bolstered by new genetic  
115 elements associated with either increased invasiveness or lower fitness cost (26,35).  
116 The molecular epidemiological situation of MRSA within Switzerland in a historic and international  
117 context has so far not been evaluated. The Culture Collection of Switzerland (CCoS)(36) is a  
118 national repository for microorganisms and contains ancient clinical *S. aureus* isolates collected  
119 between 1965 and 1987 based on unusual phenotypes, such as antibiotic resistance. This is the  
120 time-period when MRSA was establishing itself as a major nosocomial pathogen, from when the  
121 number of publicly available whole genomes is quite limited, with just 103 from isolates between  
122 1960 and 1992. Therefore, we aimed to perform an in-depth characterization of this Swiss legacy  
123 collection using whole genome sequencing and to position the results in a global context through  
124 comparison with publicly available genomes and modern Swiss MRSA.

## 125 Results and discussion

### 126 Epidemiological context of the CCoS

127 We collected and analyzed a legacy MRSA collection from Switzerland (CCoS; n=451, collected  
128 between 1965-1987), all publicly available genomes from a similar time-period (public  
129 repositories; n=103, mainly from UK, Denmark, and Asia, collected between 1950 and 1992), and  
130 modern Swiss MRSA isolates collected at the University Hospital Basel (USB; n=1207, deriving  
131 from different Swiss institutions, collected between 2009 and 2022). We characterized the  
132 genomes using MLST, core genome MLST (cgMLST), and whole genome phylogeny.

133 The complete dataset of 1761 genomes comprise 81 STs, of which 75 have been previously  
134 described (**Figure 1, Supplementary material 1**). Prior to 2000, 554 genomes were analysed,  
135 belonging to 17 STs. Of these, six STs were previously undescribed and include 32 isolates.  
136 These six undescribed STs comprise two novel combinations of known loci (ST7844 and ST7842)  
137 and four exhibiting previously undescribed alleles (ST7638, ST7837, ST7839, and ST7843)  
138 (**Figure 1**).

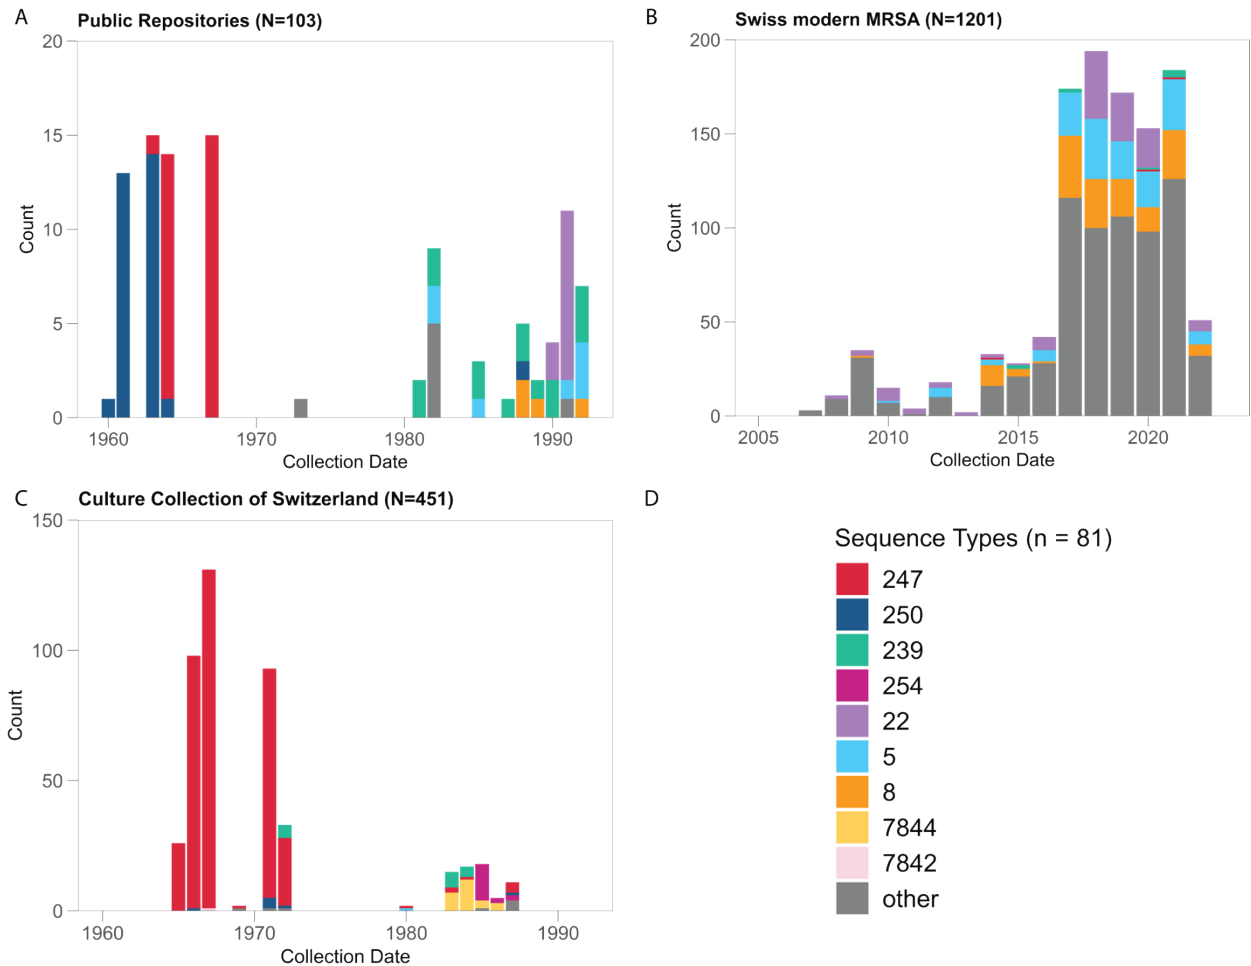

139

140 Figure 1: Epidemic distribution of MLST sequence types by collection year and dataset (A: Public repositories, B: Culture Collection  
 141 of Switzerland, C: Contemporary Swiss MRSA, D: Legend). Samples with no collection year are not represented, n=6. STs present  
 142 in low numbers are only shown as “other” (gray). Be aware that each subfigure has a different y-axis.

143 In both ancient datasets (**Figure 1A, 1C**) most of the samples were collected between 1960 and  
 144 1972. The CCoS collection was dominated by ST247 isolates from the mid 1960s to the early  
 145 1970s, coinciding with low levels of ST250 and ST239 (**Figure 1C**). A decade later, these STs  
 146 were still present but we also registered ST254 and ST7844. The STs from public repositories of  
 147 the same time period are similar (**Figure 1A**). From 1980 onwards, the STs represented in the  
 148 international collection are ST239, ST8, ST5, and ST22. Of note, all the previously mentioned  
 149 STs, except for ST5 and ST22, belong to CC8, as seen in the MLST minimum spanning tree  
 150 (MST, **Figure 2**). Among modern Swiss MRSAs, we observed many more STs with the most  
 151 common being ST22, ST5, and ST8 (**Figure 1B**). Other STs common in the CCoS are detected  
 152 in small numbers among modern samples (ST239 and ST247).

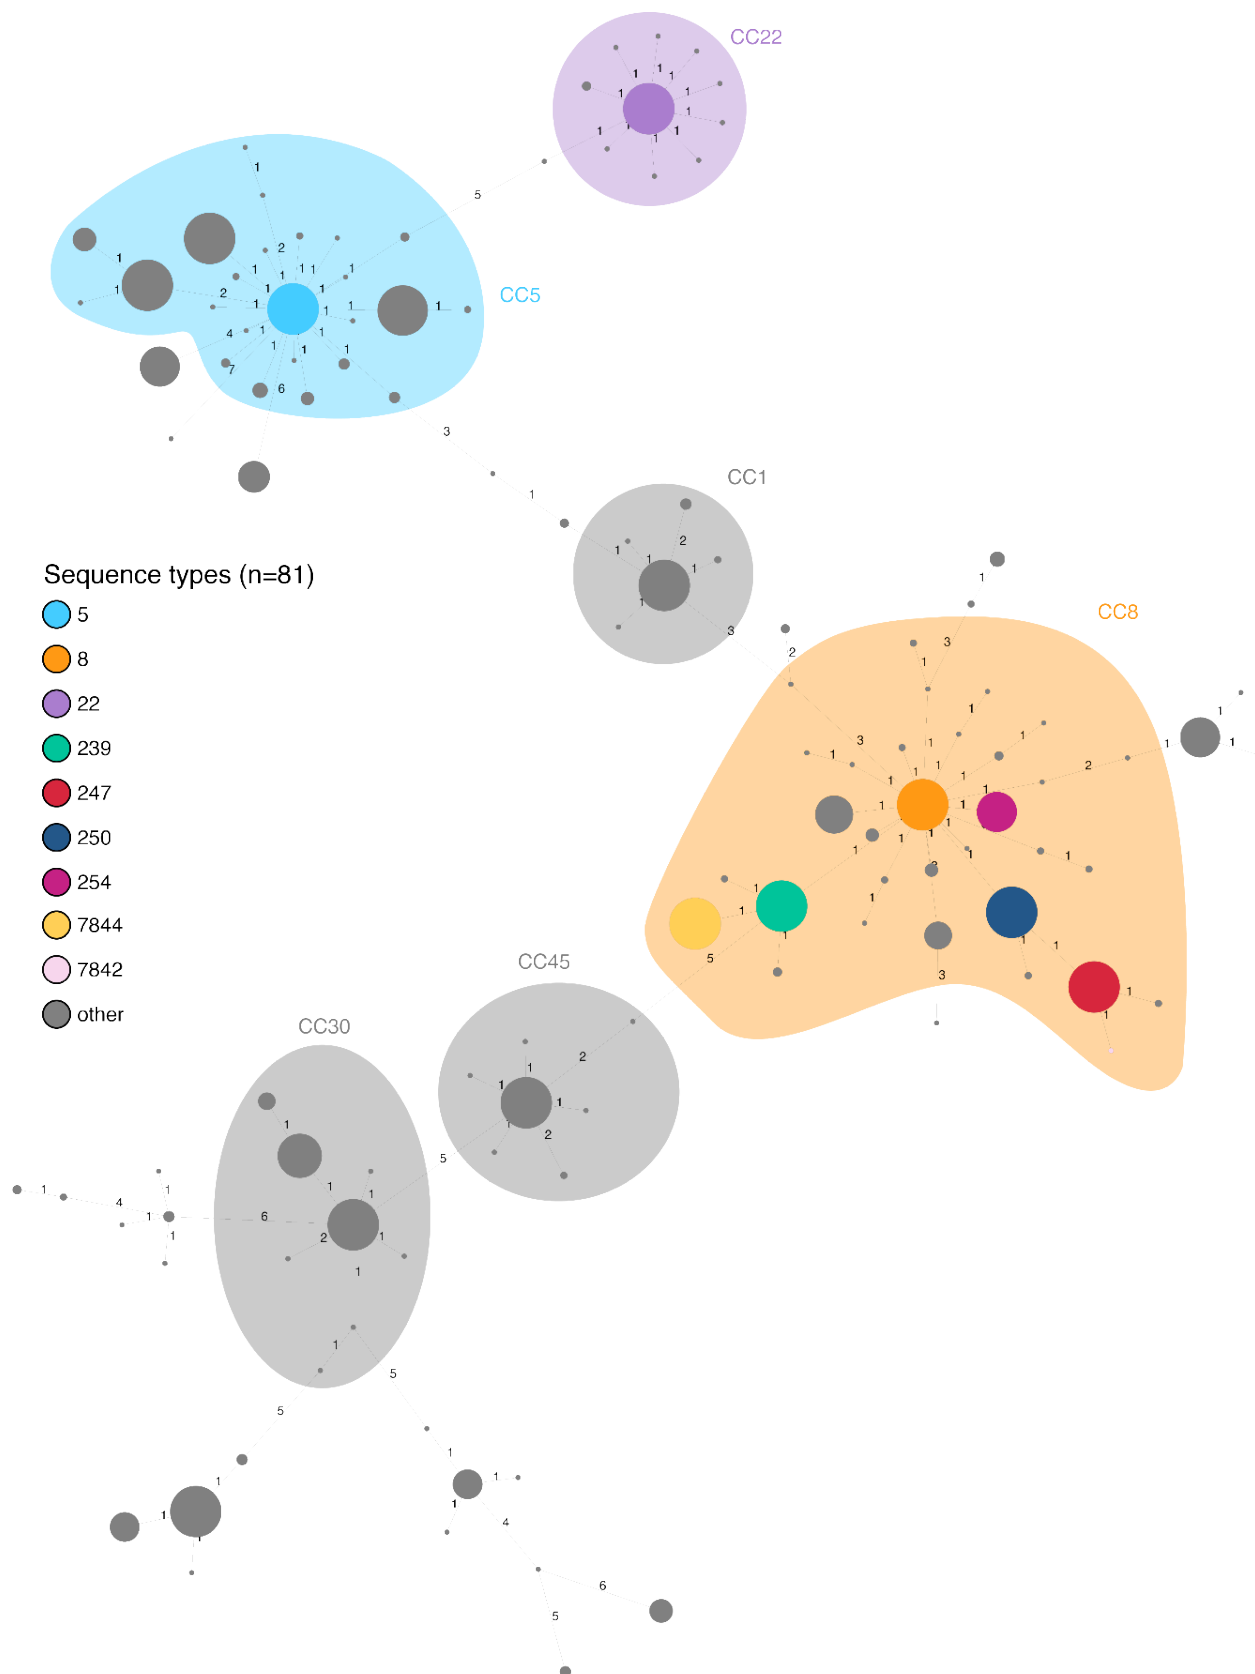

153

154

155

156

157

Figure 2: MLST minimum spanning tree generated by Ridom SeqSphere+ (n=1761). Nodes colored by ST with CC superimposed. CCs are defined as all STs which match their central genotype (ST) in four or more loci. Branch labels show number of allelic differences.



158 Within CC8, ST250, ST254, and ST239 are single locus variants (SLVs) of ST8, while ST247 is  
159 a SLV of ST250. The novel STs 7844 and 7842 are SLVs of ST239 and ST247, respectively. The  
160 high prevalence of ST247 among the CCoS sample set mirrors the epidemiological situation of  
161 other European countries at the time (9,18,37). In addition, the Swiss ST239 from 1972 (n=5)  
162 demonstrate that ST239 isolates were already present in Europe in the early 1970s and provides  
163 the earliest sequenced ST239 MRSA available (19). The results were visualized on a map  
164 (**Supplementary material 14**). An interactive version of the map can also be found online under  
165 [https://github.com/svannib/ancient\\_MRSA/tree/main/ancient\\_MRSA\\_map](https://github.com/svannib/ancient_MRSA/tree/main/ancient_MRSA_map).

166

### 167 **Identification of successful ancient lineages through cgMLST clustering**

168 The average *S. aureus* genome contains 2872 coding sequences (CDSs), of which 1861 are  
169 present in the *S. aureus* core genome MLST scheme (38,39). The cgMLST analysis of all ancient  
170 genomes (n=554) yielded a cgMLST MST whose nodes have been colored by ST (**Figure 3**),  
171 isolation country (**Supplementary material 2**), and collection decade (**Supplementary material**  
172 **3**). Isolates of the same ST can be seen to generally cluster together. However, we observed that  
173 some STs exhibit higher diversity between isolates than others. For example, distances among  
174 ST247 isolates rarely exceed 30 alleles, while ST5 samples often lie more than 200 alleles apart.  
175 The isolates of these STs were sampled over very different time periods (ST247 mainly from 1963  
176 to 1987 with three sample after 2000, while ST5 is more evenly distributed from 1980 to 2022,  
177 both with a gap in from mid-1990s to the mid-2000s) so this wide sampling could explain, at least  
178 in part, this higher diversity. Generally, STs with higher diversity contain samples isolated over a  
179 longer period. Another example is ST239, which shows a high diversity by cgMLST (allelic  
180 divergence between 50 and 120), with isolates from geographically distant countries (Australia,  
181 Singapore, United States, and Switzerland) and collected between 1972 and 2021. The genomes  
182 from the earliest ST239 (n=5) are central to this group (**Supplementary figure 2**, highlighted in  
183 red). ST5 isolates are distant from other STs (1382 allele differences), displaying allelic distances

184 up to 207 within this ST. ST22 samples are also distant from other groups (1599 allele  
185 differences), were isolated from different regions of Britain, and show allele differences of up to  
186 37. The biggest allelic differences are seen between CCs, exceeding 1000 allele differences in  
187 all cases, while inside CCs distances never exceed 500 allelic differences.

188 We identified seven putative transmission clusters, using a cluster cutoff of 24 allele differences  
189 (**Figure 3**). Cluster 1 contains ST247 samples collected between 1960 and 1999, suggesting that  
190 isolates within this cluster remained successfully circulating throughout the decades. Cluster 2  
191 also encompasses ST247 samples isolated in the 1960s from Switzerland and Denmark, where  
192 the first ST247 was identified. Cluster 3 includes both Swiss (n=20) and British (n=1) ST239  
193 isolates, along with ST7844, the two STs separated by 11 allelic differences. Clusters 4 and 5  
194 contain Swiss isolates mainly from the 1960s and 1970s, respectively. Cluster 6 contains British  
195 ST250 samples from the 1960s, representing the first described MRSA. Cluster 7 covers German  
196 ST254 whose closest relative is ST250 (203 allelic differences), this ST is usually associated with  
197 infection in horses, and is rarely seen in humans (40).

198

## 199 **Changing epidemiological landscape at the turn of the century**

200 Analysing all MRSA in our collection, from 1960 to 2022 (**Supplementary material 4**), we observe  
201 that CC8, dominant in 1960s-1970s, is not the main CC represented across modern samples.  
202 The only ST within CC8 which plays a main role after the turn of the century is ST8 (n=141/1207,  
203 12% of modern Swiss samples). This might be due to the international predominance of ST8 CA-  
204 MRSA in the last decades (41). Particularly interesting is the strong modern presence of CC5  
205 (n=306/1207, 25% of modern Swiss samples) and CC22 (n=210/1207, 17% of modern Swiss  
206 samples) isolates, which were present at the international (but not Swiss) level in the 1980s and  
207 1990s. This suggests that international lineages arrived in Switzerland around the turn of the  
208 century. Furthermore, other complexes are present in modern Swiss hospitals such as CC1  
209 (n=85/1207, 7%), CC30 (n=86/1207, 7%) and CC45 (n=53/1207, 4%).

210 In general, clones associated with HA-MRSA infections are the most prevalent both in ancient  
211 Swiss and public assemblies, possibly due to sampling bias. Modern global epidemiology shows  
212 less homogeneity, with lineages associated with community infections being more prevalent (42).  
213 These changes in epidemiological landscape mirror the recent growth in MRSA biodiversity  
214 reported internationally (30,34).  
215

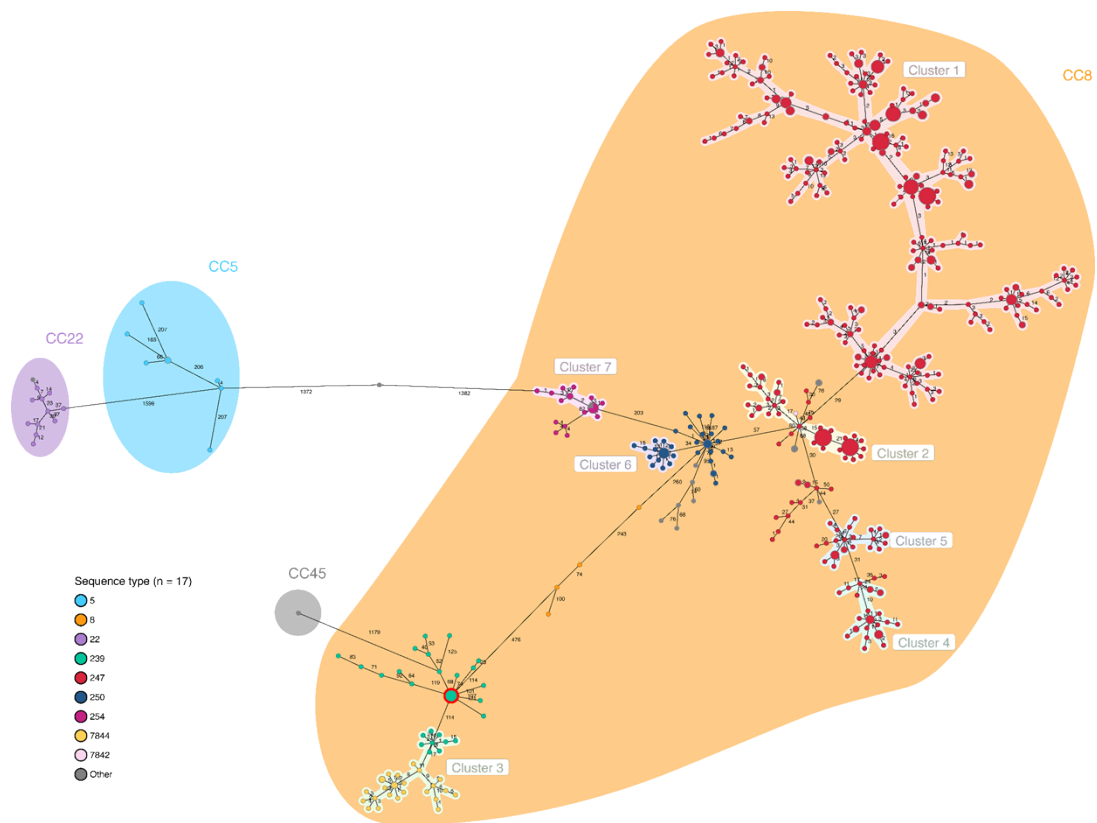

216  
217 Figure 3: cgMLST MST of CCoS and public repository genomes of MRSA (1960-1992, n = 554), nodes colored by sequence type  
218 and CCs are shaded. Clusters are shown with a maximal cluster distance of 24 allele differences and a minimal cluster size of 15.  
219 The earliest ST239 (1972) isolates are circled in red.

220  
221 **Genotypic antimicrobial resistance (AMR) prediction and core genome phylogeny**  
222 To analyze the genomic data on a SNP rather than allele basis, core genome SNP phylogenies  
223 were calculated, calculated first on genomes from the CCoS and from public repositories sampled  
224 between 1960 and 1992 (n=554; 2034 core genes present in over 99% of 554 isolates)

225 **(Supplementary material 5)**, and subsequently with all MRSA covering a period from 1960 to  
226 2022 (n=1761; 1225 core genes across 777 genomes) **(Supplementary material 6)**. Both  
227 phylogenies show isolates from the same ST clustering together, as seen with cgMLST. We also  
228 observe the previously mentioned increased diversity among modern MRSA, with samples  
229 isolated after 2009 having a broader variety of STs.

230 Prediction of AMR from the genome was limited to antibiotics that are important: (i) for  
231 classification of MRSA (oxacillin); (ii) for the history of MRSA (penicillin); or (iii) current clinically  
232 relevant antimicrobials (tetracycline, erythromycin, clindamycin, gentamicin, and ciprofloxacin).  
233 Sensitivity of the methods, the ability to correctly predict AMR, and specificity, the ability to  
234 correctly predict susceptibility, were calculated by comparing genotypic predictions to available  
235 phenotypic data **(Table 1)**.

236 Table 1: Sensitivity and specificity of AMR prediction for selected antibiotics and their respective antibiotic resistance encoding genes  
237 (ARG). The number of resistant and sensitive phenotypes given are based on the antibiograms (n = 451, EUCAST).

| Antibiotic    | Genes                     | resistant phenotypes | sensitive phenotypes | sensitivity [%] | specificity [%] |
|---------------|---------------------------|----------------------|----------------------|-----------------|-----------------|
| penicillin    | <i>blaZ</i>               | 450                  | 1                    | 95.8            | 0               |
| oxacillin     | <i>mecA</i>               | 451                  | 0                    | 99.1            | -               |
| clindamycin   | <i>ermA</i> , <i>ermC</i> | 440                  | 11                   | 98.4            | 27.3            |
| erythromycin  | <i>ermA</i> , <i>ermC</i> | 444                  | 7                    | 98.4            | 42.9            |
| gentamicin    | <i>aac(6)-aph(2')</i>     | 55                   | 396                  | 89.1            | 98.2            |
| tetracycline  | <i>tetM</i> , <i>tetK</i> | 450                  | 1                    | 100.0           | 100             |
| ciprofloxacin | <i>gyrA</i> , <i>griA</i> | 1                    | 450                  | 0.0             | 98              |

238

239 The detection of antibiotic resistance genes (ARGs) of *S. aureus* to predict phenotypic resistance  
240 can reach specificity and sensitivity similar to routine susceptibility testing (43,44). In our case,  
241 sensitivity to clindamycin and erythromycin seem to be particularly challenging to predict. Both  
242 phenotypic and predicted antibiotic susceptibility data are displayed adjacent to the core genome  
243 phylogeny in **Figure 4** with a binary heatmap showing concordance between the two to facilitate  
244 interpretation. As expected in an MRSA-only dataset, all isolates are resistant to meropenem,  
245 which was consequently removed from the visualization. However, four samples from the CCoS  
246 display an oxacillin-resistant phenotype despite no *mecA* or other *mec* variants being identified  
247 within the genomes. This could be due to beta-lactam resistance caused by mechanisms other  
248 than *mecA*, such as expression of penicillin-binding-proteins with low antibiotic affinity (45,46) or  
249 overexpression beta-lactamases (47) or loss of the cassette after the phenotype was determined.

250 Penicillin resistance (*blaZ*) is widespread in this dataset (99.8%, 450/451 penicillin resistant  
251 phenotypes, 94.9%, 526/554 ancient genomes possess *blaZ*), being absent only from the majority  
252 of ST5 and some ST254 isolates (**Figure 4**). MRSA possessing *blaZ* has been previously  
253 documented: since the late 1960s to this day, isolates are often resistant to penicillin (48,49).  
254 Also, among modern Swiss MRSA, *blaZ* is still present in the majority of isolates (89.5%,  
255 1080/1207 genomes), a finding supported by other studies on European *S. aureus* (50).  
256 Resistance to tetracycline is widespread (94.0%, 521/554) except for within ST5, ST22, and some  
257 ST250 genomes. Clindamycin resistance and erythromycin resistance are common among  
258 ST247 samples, except for ancient Danish genomes, present in some ST5 and ST22, and rare  
259 in ST250. Gentamicin resistance is a common feature among ST239, ST254, and ST7844, while  
260 being sparsely present throughout the rest of the dataset; ST22 and ST250 are uniformly  
261 gentamicin sensitive. Ciprofloxacin resistance is rare across the entire dataset. However,  
262 prediction of ciprofloxacin resistance is not very sensitive (**Table 1**), and the more recent  
263 introduction of the antibiotic on the market (1987) (51) might explain the limited numbers of  
264 resistant isolates in ST239, ST5, and ST22. Higher incidence of ciprofloxacin resistance is  
265 registered in modern Swiss MRSA (37%, 452/1207).

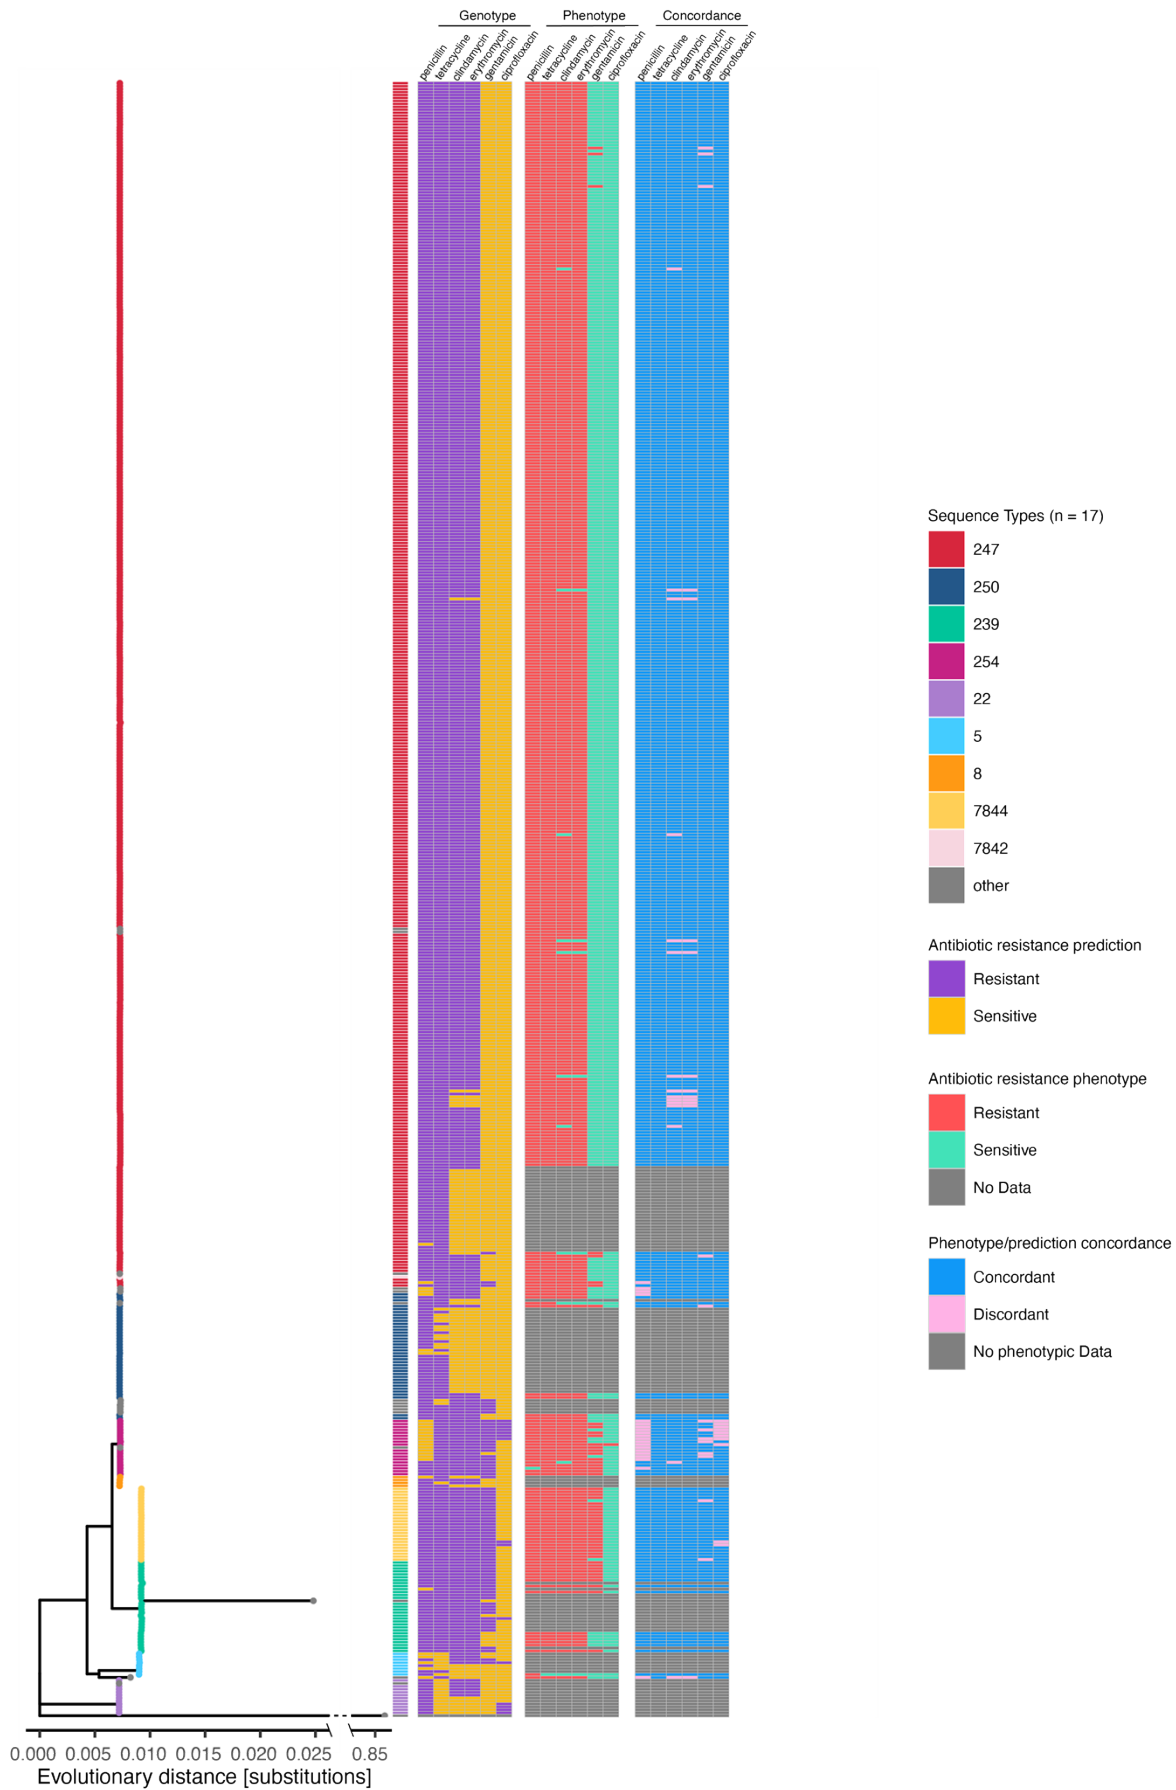

266

267 Figure 4 Predicted resistance/sensitivity, phenotypical resistance/sensitivity and concordance between the two mapped to a Maximum  
 268 likelihood core genome SNP tree of ancient Swiss and international MRSA (1960 -1992, n = 554). Leaves colored by sequence type.  
 269 Outgroup (*S. epidermis*) line shortened through X-axis break for visualization purposes.

270 This dataset suggests that ancient ST247 gained genes leading to a broader resistance profile  
271 (clindamycin, erythromycin, and tetracycline) compared to some early ST250. This might be one  
272 of the factors which contributed to the success of the former and to the decline of the latter ST as  
273 epidemic MRSA clones (9). This is supported by other studies conducted on early MRSA isolates  
274 (6). The early Danish ST247 samples in this dataset are erythromycin and clindamycin sensitive,  
275 but they may present a biased portrayal of isolates of the time, since widespread erythromycin  
276 and clindamycin resistance in ST247 isolates from the same period have been reported (18). The  
277 phylogeny of the dereplicated dataset (**Supplementary material 7**) suggests that modern Swiss  
278 MRSA have a higher variability of resistance patterns than ancient MRSA, even among closely  
279 related isolates. This could be due to the isolates coming from geographically separated Swiss  
280 hospitals, or may be an artefact of the analytical dereplication performed on the modern Swiss  
281 MRSA, as groups of very similar genomes are collapsed into one datapoint.

282

## 283 Virulence genes

284 Across all datasets, 35 unique virulence encoding genes were identified, the most common being  
285 for hemolysins and proteases, present in more than 90% of all isolates. Also common were  
286 staphylokinase (*sak*), staphylococcal complement inhibitor (*scn*), and toxin encoding genes such  
287 as *lukD*, *lukE*, *sek*, *seq*, and *seb*. Other staphylococcal enterotoxins (*se\_*) were far less common,  
288 while the arginine catabolic mobile element (*ACME*) and toxic shock syndrome toxin (*tst*) were  
289 present in under 1% of samples. A virulence gene presence/absence heatmap was mapped to a  
290 phylogenetic core genome tree of the isolates (**Figure 5**), showing frequent co-occurrence of *sak*  
291 and *scn*. Furthermore, international ST5 and ST22 isolates exhibit a general lack of serine-like  
292 proteases (*splA/B/E*) and toxins (*lukD*, *lukE*, *seb*, *sek*, *seq*) in favor of another group of  
293 staphylococcal enterotoxins (*seg*, *sei*, *sem*, *sen*, *seo*, *seu*, *sec*, *sel*). This strong co-occurrence to  
294 one another may suggest a pathogenicity island. ST239 and ST7844 broadly lack *seb* while  
295 generally displaying *sea* presence. However, ST7844 and its most closely related Swiss ST239  
296 group also lack *sek* and *seq*. Previously described pathogenicity islands which could play a role

297 in the distribution and dissemination of the virulence genes seen in the dataset are vSA $\beta$  (*sea*,  
298 *seg*, *sei*, *sem*, *sen*, *seo*, *splA*, *slpB*, *slpE*, *lukD*, *lukE*), saPI3 (*seb*, *sek*, *seq*), and plB485 (*sej*, *sed*)  
299 (52). The major toxin Panton-Valentine Leukocidin (*lukF-PV*, *lukS-PV*) which heightens the  
300 virulence of MRSA (53) is sparsely present in modern Swiss MRSA, but completely absent from  
301 isolates prior to 2009 (**supplementary material 8**). This lies in contrast with the high rates of  
302 Leukocidin reported in the US (54). A limitation of this virulome analysis is its reliance on WGS  
303 and gene presence/absence instead of diagnostic tests. Still, this approach has shown high  
304 concordance with phenotype-based methods (55).

305

### 306 **SCC*mec* Types**

307 Among 777 dereplicated genomes, six unique SCC*mec* cassette types were detected, as well as  
308 several ambiguous predictions. For isolates which were predicted as methicillin-sensitive despite  
309 having a resistant phenotype (n=5), no cassette was found in their genomes. SCC*mec* type I is  
310 by far the most prevalent (462/777, 59%), followed by type IV (144/777, 19%), and type III  
311 (61/777, 8%). SCC*mec* cassette types mapped to the core genome phylogeny (**Supplementary**  
312 **material 9**) illustrate strong co-occurrence between cassette types and ST lineages. SCC*mec* I  
313 is strongly represented within ST247 and ST250 among ancient isolates (27). SCC*mec* type IV  
314 (2B) is common among ancient and modern ST22, ST5, and ST8 isolates (**Supplementary**  
315 **material 10**). Three of the five major ST8-related epidemic MRSA clones are represented in this  
316 dataset (27). ST247-MRSA-I, ST250-MRSA-I (accounting for 80% (442/554) of the ancient  
317 genomes), and ST8-MRSA-IV. Another strongly represented epidemic MRSA, although it rose to  
318 prominence later than ST250-MRSA-I and ST247-MRSA-I, is ST239-MRSA-III (27), which has  
319 the same cassette as the SLV ST7844-MRSA-III.

320 In modern Swiss MRSA, SCC*mec* type IV in ST5, ST8, and ST22 isolates is the dominant  
321 cassette type. These lineages have often been reported as dominant in many countries spanning  
322 the globe (56–61). The wide presence of type IV in different MRSA lineages and other  
323 staphylococcal species might suggest an improved horizontal genetic transfer rate and/or lower  
324 fitness cost (35,62,63).





### 330 **International lineages shaped modern Swiss MRSA epidemiology**

331 Based on cgMLST and core SNP trees, three groups were chosen for whole genome SNP  
332 analysis: ST239, ST7844 and closest STs (group 1, **Supplementary material 11A-B**); ST250  
333 together with ST247 (group 2, **Supplementary material 12A-B**); and ST22 (group 3,  
334 **Supplementary material 13A-B**). SNP phylogenies were generated using hybrid assembled  
335 Illumina/Nanopore reference genomes from within the cluster to best capture the diversity, and  
336 time trees were used to estimate the temporal origins of each group.

337 The resulting phylogenetic tree of ST239 indicates that group 1 strains evolved from an ST239  
338 ancestor, with SNP in MLST target genes resulting in SLV within the group. One example is a  
339 mutation in *g<sub>l</sub>pf* which gave rise to ST7844 in a lineage which appears to previously have been  
340 successful, but which is not represented in modern Swiss MRSA.

341 One cluster within this group contains Swiss, German, and British ST239 and ST7844, which  
342 were collected before 1990 (Bayesian cluster 3). It has no modern samples, hinting at its  
343 disappearance from Switzerland. Another cluster contains the earliest ST239 from Switzerland  
344 and international isolates from the 1980s and 1990s (cluster 4). Interestingly, some modern  
345 ST239 isolates (cluster 1-2) are closer to cluster 4 than to other modern samples. Cluster 5 covers  
346 both ancient ST239 from Singapore and modern Swiss ST368 and ST241, pointing to an  
347 introduction of this group into Switzerland at the turn of the century. The root of group 1 was dated  
348 to approximately 1950 (95% confidence interval (CI): 1941-1957).

349 The SNP phylogeny of ST247 and ST250 (group 2) shows that six Bayesian clusters of ST247  
350 are present in the CCoS (Supplementary File 12A-B). Bayesian cluster 6 covers both Swiss and  
351 Danish samples collected in the 1960s, alluding to international transmission within Europe at the  
352 time. Modern ST247 play a small role in the modern Swiss epidemiology of MRSA, but these  
353 modern isolates cluster with ancient Swiss, British, and Belgian ST250s. The root of this group  
354 was dated to 1870 (95% CI: 1851-1885).

355 The ST22 phylogeny (group 3, Supplementary material 13A-B) (origin dated to 1914 (95% CI:  
356 1907-1918)) again hints at the international origin of lineages circulating today in Switzerland, as

357 British isolates from the 1980s are closely related to the ancestors of 85 modern Swiss samples  
358 (clusters 5 and 4).  
359 Overall, SNP phylogeny of cgMLST clusters provides evidence as to which of the old international  
360 MRSA lineages appeared briefly in Switzerland before being displaced, and which contributed to  
361 the MRSA diversity we see in modern Switzerland.

## 362 Conclusion

363 Since the 1960s, MRSA has been a challenging bacterial pathogen faced by clinicians worldwide.  
364 This study sheds light on the spread and relationships of major early MRSA clones. Our genome  
365 collection includes 451 MRSA samples from CCoS isolates between 1965 and 1987s, alongside  
366 103 ancient MRSA genomes from public repositories and 1207 modern MRSA isolated in Swiss  
367 hospitals. Despite being a sample set which is potentially unrepresentative of the diversity in  
368 Switzerland at the time, our data reveal an ancient epidemiological landscape within Switzerland  
369 similar to that in the rest of Europe at the time. MRSA lineages which played an important role  
370 across European and Swiss hospitals from the 1960s to the 1990s, such as ST247-MRSA-I,  
371 ST250-MRSA-I and the earliest ST239-MRSA-III are represented in the CCoS. Today, these  
372 clones appear to have been displaced in Switzerland, with international lineages from the last  
373 quarter of the 20th century, including ST5-MRSA-IV, ST8-MRSA-IV, and ST22-MRSA-IV now the  
374 major players in Swiss hospitals. An analysis of the AMR and virulence profiles showed how  
375 different STs are associated with different AMR and virulence encoding genes. The limitations of  
376 this study are: a) the lack of sequenced Swiss isolates between 1988 and 2008, which prevents  
377 us from fully understanding the epidemiological changes which happened over the turn of  
378 the century and b) the lack of phenotypic resistance data for the current Swiss MRSA, which  
379 would make our lineage-resistance association more robust and precise. These data from CCoS  
380 hold high scientific interest, as the collection contains some of the first MRSA ever isolated and  
381 whose whole genome sequences we now present. We have thus significantly increased the public  
382 available genomes from the early period. The volume of isolates and phenotypic characterization

383 make them an important addition to the pool of MRSA genomic data of isolates isolated in the  
384 second half of the 20<sup>th</sup> century. The analysis of early pathogenic MRSA such as these isolates  
385 leads to a deeper understanding of its epidemiology which may help current and future efforts in  
386 infection control and prevention.

## 387 **Materials & Methods**

### 388 **Whole genome sequencing and phenotypic AMR profiling**

389 Bacterial genome assemblies from the CCoS and from the University Hospital Basel (USB) were  
390 generated at the Division of Clinical Bacteriology (USB) according to their ISO 17025 accredited  
391 standard procedures. DNA was extracted with a Qiagen BioRobot EZ1 using the QIAamp DNA  
392 Mini Kit (QIAGEN, Hilden, Germany) and according to the manufacturer's guidelines. Library  
393 preparation was performed using an Illumina Nextera DNA Flex Library Prep Kit and multiplexing  
394 at 96-plex on a NextSeq 500 System using the Mid-Output Kit (Illumina, San Diego, USA).  
395 Resulting fastq files underwent a quality check, where the sequences with a phred score lower  
396 than 30 were discarded (only sequences with a base calling accuracy above 99.9% are kept).  
397 Sequencing data was quality controlled using FastQC (v 0.11.5) (64), MetaPhlAn (v 2.7.7) (65).  
398 Adaptors were trimmed using Trimmomatic (v 0.38) using default parameters  
399 (ILLUMINACLIP:2:30:10 SLIDINGWINDOW:4:15 MINLEN:125) (73). Genome assemblies were  
400 created *de novo* using Unicycler (v 0.3.0b) (66) and checked with QUAST (v 5.0.2) (67) Further  
401 details can be found in (68).  
402 For the isolates from CCoS, a phenotypic antibiotic resistance analysis was conducted as follows:  
403 bacteria were grown on CHROMID/MRSA Agar (bioMérieux, Marcy-l'Étoile, France) at  $35 \pm 2^\circ\text{C}$   
404 for 48h. Antibiotic susceptibilities were determined using a microdilution assay (Vitek2,  
405 bioMérieux, Marcy-l'Étoile, France) and interpreted according to breakpoints published by the  
406 European Committee on Antimicrobial Susceptibility Testing (EUCAST), version 9.0 (69).

## 407 **Nanopore sequencing**

408 Ten isolates from the CCoS were chosen for nanopore sequencing. DNA was extracted from the  
409 bacterial pellet using the DNA mini (Qiagen) kit on the QIAcube robot (Gram + Enzymatic lysis  
410 protocol) with 150 µl elution volume. Long read libraries were prepared using the ligation  
411 sequencing kit (SQK-LSK 109). The libraries were sequenced using GridION with R9.4 flow cells  
412 with a default 72h run time. Basecalling and de-multiplexing were carried out within the inbuilt  
413 MinKnow (21.05.12) software. Basecalling was done using Guppy (5.0.12) high accuracy model.  
414 Quality check was carried out using Nanoplot (1.35.4) (70) and MetaPhlAn (3.0.13) (65). Trimming  
415 was done with Porechop (0.2.3) (71). Short reads were removed with Filtrlong (0.2.0) (72).  
416 Assembly was performed with flye (2.8.1) (73) and polished with racon (1.4.7) (74), medaka  
417 (1.4.4) (75) and polypolish (v0.4.3) (76). Raw data can be found at the European Nucleotide  
418 Archive under accession number [PRJEB59014](#).

419

## 420 **Collection of public genomes**

421 The timeframe covered by the 451 *S. aureus* isolates from the CCoS is from 1965 to 1987. The  
422 parameters for the search of public genomes were set at a slightly wider timeframe (1960-1992)  
423 to allow for a wider selection of isolates. 108 assembled genomes were downloaded from NCBI  
424 Pathogen Detection (77). NCBI Pathogen. The 108 genomes, and their respective metadata,  
425 were obtained by applying the following criteria: Species: *Staphylococcus aureus*, Collection date:  
426 1960 to 1992. 150 genomes were downloaded from Pathogenwatch (78,79). The assemblies  
427 were found by searching for *Staphylococcus aureus* genomes collected between January 1960  
428 and December 1992.

429

## 430 **Data filtering**

431 Filtering criteria were applied to both the public and in-house sequenced isolates. Only isolates  
432 which satisfy the following conditions were kept: Genome length within  $\pm 10\%$  of reference *S.*

433 *aureus* genome NCTC 8325; where recorded, read depth greater than 20x; if antibiogram was  
434 present, resistance to oxacillin, otherwise presence of *mecA* in the genomes was considered as  
435 denoting an MRSA. 46 isolates with an oxacillin-sensitive phenotype were removed to focus the  
436 analysis on MRSA, as oxacillin belongs to the same drug class it shares its mode of action with  
437 methicillin and has replaced methicillin in clinical use. 23 further isolates which possessed no  
438 phenotypic data and were predicted as MSSA during analyses were discarded. Additionally, 131  
439 duplicate genomes were removed. Two CCoS isolates were removed for low read depth (<20x).  
440 Finally, 1207 MRSA genomes isolated in multiple Swiss hospitals and sequenced at the University  
441 Hospital of Basel between 2007 and 2022 were selected to represent a modern collection. After  
442 this process 451 MRSA isolates from the CCoS, 103 from public repositories (18 from  
443 Pathogenwatch and 85 from NCBI Pathogen Detection), and 1207 from the USB were used in  
444 further analysis.

## 445 **Genotyping**

446 This work used two genotypic typing methods: multi-locus sequence typing (MLST) and core  
447 genome MLST (cgMLST, (38)). The genomes were typed in Ridom SeqSphere+ (v8.3.0),  
448 generating MSTs of MLST or cgMLST data, and a world map displaying the origin of the isolates  
449 (Map data © Google, INEGI). For all visualizations, colorblind-friendly color palettes were created  
450 with the “colors” website (80). cgMLST clusters were generated with a minimum cluster size of  
451 15 and a maximum cluster distance of 24 different alleles (38).

## 452 **Phylogenies**

453 To improve visualization comprehensibility for this step, the 1207 genomes from the USB were  
454 dereplicated with a 0.005 threshold in Assembly Dereplicator (v0.1.0) (81) resulting in 223  
455 genomes. Assembly dereplicator clusters the genomes with dissimilarity lower than the threshold  
456 and keeps the assembly with the largest N50 for each cluster. An *S. epidermis* reference genome  
457 (NZ\_CP035288.1) was added as an outgroup for rooting purposes. Prokka (v1.14.5) (82) was used

458 to annotate the genomes. From the annotated genomes, a the core genome alignment was  
459 generated with roary (v3.13.0) (82). This core genome alignment was processed with IQ-TREE 2  
460 (v 2.2.1) (83). Whole genome alignments of cgMLST clusters were calculated with SKA (v 1.0)  
461 (84), within-house hybrid assemblies used as a reference where available. For ST22, reference  
462 sequence NZ\_CP053101.1 was used. From these alignments, phylogenies without  
463 recombination were generated with gubbins (v 3.2.1) (85) and rooted with BactDating (v1.1.1)  
464 (86). Clusters were investigated with fastBAPS (v 1.0.8) (87). The phylogenies were visualized  
465 in RStudio (v2022.07.1+554).

## 466 **AMR and virulence prediction**

467 In order to predict AMR and virulence, parts of the -finder software suite developed by the Danish  
468 center for genomic epidemiology were used. The Resfinder Software (88) was applied to all  
469 genomes. Leveraging the antibiograms of the isolates, they were compared with the software  
470 prediction to gauge software performance. Virulencefinder (89) was also run on all genomes. The  
471 detected genes were arranged in a presence absence matrix. Subsequently the virulence genes  
472 were classified by using the virulence factors database VFDB (90), Uniprot (91) and by consulting  
473 relevant publications.

## 474 **SCC*mec* cassettes**

475 SCCmecfinder was also implemented for the genome set after dereplication using the  
476 SCCmecfinder web server (92).

477

## 478 **R packages**

479 The following R packages were used: pacman (v0.5.1) (93), tidyverse(v1.3.4) (94), rjson (v0.2.21)  
480 (95), ggtree (v3.2.1) (96), treeio (v1.18.1) (97), tidytree (v0.4.1) (98), ape (v5.6.2) (99), flextable  
481 (v0.8.2) (100), BactDating (v1.1.1) (86), fastbaps (1.0.8) (87), svglite (v2.1.0) (101), knitr (v1.4.0)  
482 (102).

483

484 **Acknowledgments:**

485 We thank Elisabeth Schulthess, Christine Kissling, Magdalena Schneider, Valerie Courtet, Daniel  
486 Gandner, Sabrina Stammler, Anne Schnäpf, Selda Turkan, Brigitte Friedli, and Rosamarie Vesco  
487 for their excellent technical assistant in sequencing the MRSA isolates and maintaining the isolate  
488 collection (all USB). We also thank Prof. Georg Lipps (Applied School of Science, Muttenz) for  
489 scientific inputs during the Bachelor thesis of Vanni Benvenga. We also thank Prof. em. Kayser,  
490 who donated this valuable isolate collection to the CCoS. Calculations were performed at  
491 sciCORE (<http://scicore.unibas.ch/>) scientific computing center at University of Basel.

492

493 **Funding:**

494 The study was funded by an unrestricted grant to Prof. Dr. Adrian Egli at the University of Basel.

495

496 **Conflict of interest:**

497 The authors do not have any conflicts of interest.



## 498 References

- 499 1. Rammelkamp CH, Maxon T. Resistance of *Staphylococcus aureus* to the Action of Penicillin.  
500 Proc Soc Exp Biol Med. 1942 Dec 1;51(3):386–9.
- 501 2. Kirby WMM. Extraction of a Highly Potent Penicillin Inactivator from Penicillin Resistant  
502 *Staphylococci*. Science. 1944 Jun 2;99(2579):452–3.
- 503 3. Bondi A, Dietz CC. Penicillin resistant staphylococci. Proc Soc Exp Biol Med Soc Exp Biol Med  
504 N Y N. 1945 Oct;60:55–8.
- 505 4. Jevons MP. “Celbenin” - resistant *Staphylococci*. Br Med J. 1961 Jan 14;1(5219):124–5.
- 506 5. Hanssen AM, Ericson Sollid JU. SCCmec in staphylococci: genes on the move. FEMS Immunol  
507 Med Microbiol. 2006 Feb 1;46(1):8–20.
- 508 6. Harkins CP, Pichon B, Doumith M, Parkhill J, Westh H, Tomasz A, et al. Methicillin-resistant  
509 *Staphylococcus aureus* emerged long before the introduction of methicillin into clinical  
510 practice. Genome Biol [Internet]. 2017 Jul 20 [cited 2021 May 25];18. Available from:  
511 <https://www.ncbi.nlm.nih.gov/pmc/articles/PMC5517843/>
- 512 7. Tsubakishita S, Kuwahara-Arai K, Sasaki T, Hiramatsu K. Origin and Molecular Evolution of  
513 the Determinant of Methicillin Resistance in *Staphylococci*. Antimicrob Agents Chemother.  
514 2010 Oct;54(10):4352–9.
- 515 8. Kreiswirth B, Kornblum J, Arbeit RD, Eisner W, Maslow JN, McGeer A, et al. Evidence for a  
516 clonal origin of methicillin resistance in *Staphylococcus aureus*. Science. 1993 Jan  
517 8;259(5092):227–30.
- 518 9. Enright MC, Robinson DA, Randle G, Feil EJ, Grundmann H, Spratt BG. The evolutionary  
519 history of methicillin-resistant *Staphylococcus aureus* (MRSA). Proc Natl Acad Sci U S A.  
520 2002 May 28;99(11):7687–92.
- 521 10. Fitzgerald JR, Sturdevant DE, Mackie SM, Gill SR, Musser JM. Evolutionary genomics of  
522 *Staphylococcus aureus*: insights into the origin of methicillin-resistant strains and the toxic  
523 shock syndrome epidemic. Proc Natl Acad Sci U S A. 2001 Jul 17;98(15):8821–6.
- 524 11. Musser JM, Kapur V. Clonal analysis of methicillin-resistant *Staphylococcus aureus* strains  
525 from intercontinental sources: association of the mec gene with divergent phylogenetic  
526 lineages implies dissemination by horizontal transfer and recombination. J Clin Microbiol.  
527 1992 Aug;30(8):2058–63.
- 528 12. Robinson DA, Enright MC. Evolutionary models of the emergence of methicillin-resistant  
529 *Staphylococcus aureus*. Antimicrob Agents Chemother. 2003 Dec;47(12):3926–34.
- 530 13. Mellmann A, Bletz S, Böking T, Kipp F, Becker K, Schultes A, et al. Real-Time Genome  
531 Sequencing of Resistant Bacteria Provides Precision Infection Control in an Institutional  
532 Setting. J Clin Microbiol. 2016 Dec;54(12):2874–81.
- 533 14. Chambers HF, Deleo FR. Waves of resistance: *Staphylococcus aureus* in the antibiotic era.  
534 Nat Rev Microbiol. 2009 Sep;7(9):629–41.

- 535 15. Blumberg HM, Rimland D, Carroll DJ, Terry P, Wachsmuth IK. Rapid development of  
536 ciprofloxacin resistance in methicillin-susceptible and -resistant *Staphylococcus aureus*. *J*  
537 *Infect Dis*. 1991 Jun;163(6):1279–85.
- 538 16. Appelbaum PC. Reduced glycopeptide susceptibility in methicillin-resistant *Staphylococcus*  
539 *aureus* (MRSA). *Int J Antimicrob Agents*. 2007 Nov;30(5):398–408.
- 540 17. Oliveira DC, Tomasz A, de Lencastre H. Secrets of success of a human pathogen: molecular  
541 evolution of pandemic clones of methicillin-resistant *Staphylococcus aureus*. *Lancet Infect*  
542 *Dis*. 2002 Mar;2(3):180–9.
- 543 18. De Lencastre H, Chung M, Westh H. Archaic Strains of Methicillin-Resistant *Staphylococcus*  
544 *aureus*: Molecular and Microbiological Properties of Isolates from the 1960s in Denmark.  
545 *Microb Drug Resist*. 2000 Jan;6(1):1–10.
- 546 19. Pavillard R, Harvey K, Douglas D, Hewstone A, Andrew J, Collopy B, et al. Epidemic of  
547 hospital-acquired infection due to methicillin-resistant *Staphylococcus aureus* in major  
548 Victorian hospitals. *Med J Aust*. 1982 May 29;1(11):451–4.
- 549 20. Teixeira LA, Resende CA, Ormonde LR, Rosenbaum R, Figueiredo AM, de Lencastre H, et  
550 al. Geographic spread of epidemic multiresistant *Staphylococcus aureus* clone in Brazil. *J*  
551 *Clin Microbiol*. 1995 Sep;33(9):2400–4.
- 552 21. de Sousa MA, Sanches IS, Ferro ML, Vaz MJ, Saraiva Z, Tendeiro T, et al. Intercontinental  
553 Spread of a Multidrug-Resistant Methicillin-Resistant *Staphylococcus aureus* Clone. *J Clin*  
554 *Microbiol*. 1998 Sep;36(9):2590–6.
- 555 22. Oliveira D, Santos-Sanches I, Mato R, Tamayo M, Ribeiro G, Costa D, et al. Virtually all  
556 methicillin-resistant *Staphylococcus aureus* (MRSA) infections in the largest Portuguese  
557 teaching hospital are caused by two internationally spread multiresistant strains: the  
558 “Iberian” and the “Brazilian” clones of MRSA. *Clin Microbiol Infect Off Publ Eur Soc Clin*  
559 *Microbiol Infect Dis*. 1998 Jul;4(7):373–84.
- 560 23. Boyle-Vavra S, Daum RS. Community-acquired methicillin-resistant *Staphylococcus*  
561 *aureus*: the role of Panton–Valentine leukocidin. *Lab Invest*. 2007 Jan;87(1):3–9.
- 562 24. Maree CL, Daum RS, Boyle-Vavra S, Matayoshi K, Miller LG. Community-associated  
563 Methicillin-resistant *Staphylococcus aureus* Isolates and Healthcare-Associated  
564 Infections1. *Emerg Infect Dis*. 2007 Feb;13(2):236–42.
- 565 25. Huang YC, Chen CJ. USA300 (sequence type 8) has become a major clone of methicillin-  
566 resistant *Staphylococcus aureus* in northern Taiwan. *Int J Antimicrob Agents*. 2022  
567 Mar;59(3):106534.
- 568 26. Boyle-Vavra S, Daum RS. Community-acquired methicillin-resistant *Staphylococcus*  
569 *aureus*: the role of Panton-Valentine leukocidin. *Lab Invest J Tech Methods Pathol*. 2007  
570 Jan;87(1):3–9.
- 571 27. Von Dach E, Diene SM, Fankhauser C, Schrenzel J, Harbarth S, François P. Comparative  
572 Genomics of Community-Associated Methicillin-Resistant *Staphylococcus aureus* Shows  
573 the Emergence of Clone ST8-USA300 in Geneva, Switzerland. *J Infect Dis*. 2016 May  
574 1;213(9):1370–9.
- 575 28. Aanensen DM, Feil EJ, Holden MTG, Dordel J, Yeats CA, Fedosejev A, et al. Whole-  
576 Genome Sequencing for Routine Pathogen Surveillance in Public Health: a Population  
577 Snapshot of Invasive *Staphylococcus aureus* in Europe. *mBio*. 7(3):e00444-16.

- 578 29. Glaser P, Martins-Simões P, Villain A, Barbier M, Tristan A, Bouchier C, et al. Demography  
579 and Intercontinental Spread of the USA300 Community-Acquired Methicillin-Resistant  
580 *Staphylococcus aureus* Lineage. *mBio*. 2016 Feb 16;7(1):e02183-02115.
- 581 30. Monecke S, Coombs G, Shore AC, Coleman DC, Akpaka P, Borg M, et al. A Field Guide to  
582 Pandemic, Epidemic and Sporadic Clones of Methicillin-Resistant *Staphylococcus aureus*.  
583 *PLoS ONE*. 2011 Apr 6;6(4):e17936.
- 584 31. Moore PCL, Lindsay JA. Molecular characterisation of the dominant UK methicillin-resistant  
585 *Staphylococcus aureus* strains, EMRSA-15 and EMRSA-16. *J Med Microbiol*. 2002  
586 Jun;51(6):516–21.
- 587 32. Holden MTG, Hsu LY, Kurt K, Weinert LA, Mather AE, Harris SR, et al. A genomic portrait  
588 of the emergence, evolution, and global spread of a methicillin-resistant *Staphylococcus*  
589 *aureus* pandemic. *Genome Res*. 2013 Apr;23(4):653–64.
- 590 33. Ellington MJ, Hope R, Livermore DM, Kearns AM, Henderson K, Cookson BD, et al. Decline  
591 of EMRSA-16 amongst methicillin-resistant *Staphylococcus aureus* causing bacteraemias  
592 in the UK between 2001 and 2007. *J Antimicrob Chemother*. 2010 Mar;65(3):446–8.
- 593 34. Uhlemann AC, Otto M, Lowy FD, DeLeo FR. Evolution of community- and healthcare-  
594 associated methicillin-resistant *Staphylococcus aureus*. *Infect Genet Evol J Mol Epidemiol*  
595 *Evol Genet Infect Dis*. 2014 Jan;21:563–74.
- 596 35. Lee SM, Ender M, Adhikari R, Smith JMB, Berger-Bächli B, Cook GM. Fitness cost of  
597 staphylococcal cassette chromosome *mec* in methicillin-resistant *Staphylococcus aureus*  
598 by way of continuous culture. *Antimicrob Agents Chemother*. 2007 Apr;51(4):1497–9.
- 599 36. CCOS Culture Collection of Switzerland - About us - History [Internet]. [cited 2021 Mar 18].  
600 Available from: [https://www.ccos.ch/about\\_us/history](https://www.ccos.ch/about_us/history)
- 601 37. Sanches IS, Ramirez M, Troni H, Abecassis M, Padua M, Tomasz A, et al. Evidence for the  
602 geographic spread of a methicillin-resistant *Staphylococcus aureus* clone between  
603 Portugal and Spain. *J Clin Microbiol*. 1995 May;33(5):1243–6.
- 604 38. Leopold SR, Goering RV, Witten A, Harmsen D, Mellmann A. Bacterial whole-genome  
605 sequencing revisited: portable, scalable, and standardized analysis for typing and detection  
606 of virulence and antibiotic resistance genes. *J Clin Microbiol*. 2014 Jul;52(7):2365–70.
- 607 39. *Staphylococcus aureus* cgMLST [Internet]. [cited 2021 Jun 28]. Available from:  
608 <https://www.cgmlst.org/ncs/schema/141106/>
- 609 40. Cuny C, Witte W. MRSA in equine hospitals and its significance for infections in humans.  
610 *Vet Microbiol*. 2017 Feb;200:59–64.
- 611 41. Tenover FC, Goering RV. Methicillin-resistant *Staphylococcus aureus* strain USA300: origin  
612 and epidemiology. *J Antimicrob Chemother*. 2009 Sep;64(3):441–6.
- 613 42. Gordon RJ, Lowy FD. Pathogenesis of Methicillin-Resistant *Staphylococcus aureus*  
614 Infection. *Clin Infect Dis Off Publ Infect Dis Soc Am*. 2008 Jun 1;46(Suppl 5):S350–9.
- 615 43. Bradley P, Gordon NC, Walker TM, Dunn L, Heys S, Huang B, et al. Rapid antibiotic-  
616 resistance predictions from genome sequence data for *Staphylococcus aureus* and  
617 *Mycobacterium tuberculosis*. *Nat Commun*. 2015 Dec 21;6(1):10063.

- 618 44. Gordon NC, Price JR, Cole K, Everitt R, Morgan M, Finney J, et al. Prediction of  
619 Staphylococcus aureus Antimicrobial Resistance by Whole-Genome Sequencing. *J Clin*  
620 *Microbiol.* 2014 Apr;52(4):1182–91.
- 621 45. Tomasz A, Drugeon HB, de Lencastre HM, Jabes D, McDougall L, Bille J. New mechanism  
622 for methicillin resistance in Staphylococcus aureus: clinical isolates that lack the PBP 2a  
623 gene and contain normal penicillin-binding proteins with modified penicillin-binding  
624 capacity. *Antimicrob Agents Chemother.* 1989 Nov;33(11):1869–74.
- 625 46. Michel M, Gutmann L. Methicillin-resistant Staphylococcus aureus and vancomycin-resistant  
626 enterococci: therapeutic realities and possibilities. *Lancet Lond Engl.* 1997 Jun  
627 28;349(9069):1901–6.
- 628 47. McDougal LK, Thornsberry C. The role of beta-lactamase in staphylococcal resistance to  
629 penicillinase-resistant penicillins and cephalosporins. *J Clin Microbiol.* 1986  
630 May;23(5):832–9.
- 631 48. Peacock SJ, Paterson GK. Mechanisms of Methicillin Resistance in Staphylococcus aureus.  
632 *Annu Rev Biochem.* 2015;84:577–601.
- 633 49. Lowy FD. Staphylococcus aureus infections. *N Engl J Med.* 1998 Aug 20;339(8):520–32.
- 634 50. Rasmussen G, Monecke S, Brus O, Ehricht R, Söderquist B. Long Term Molecular  
635 Epidemiology of Methicillin-Susceptible Staphylococcus aureus Bacteremia Isolates in  
636 Sweden. *PLoS ONE.* 2014 Dec 5;9(12):e114276.
- 637 51. Drugs@FDA: FDA-Approved Drugs [Internet]. [cited 2021 Jul 14]. Available from:  
638 [https://www.accessdata.fda.gov/scripts/cder/daf/index.cfm?event=overview.process&Appl](https://www.accessdata.fda.gov/scripts/cder/daf/index.cfm?event=overview.process&ApplNo=019537)  
639 [No=019537](https://www.accessdata.fda.gov/scripts/cder/daf/index.cfm?event=overview.process&ApplNo=019537)
- 640 52. Malachowa N, DeLeo FR. Mobile genetic elements of Staphylococcus aureus. *Cell Mol Life*  
641 *Sci.* 2010 Sep 1;67(18):3057–71.
- 642 53. Lina G, Piémont Y, Godail-Gamot F, Bes M, Peter MO, Gauduchon V, et al. Involvement of  
643 Panton-Valentine Leukocidin—Producing Staphylococcus aureus in Primary Skin  
644 Infections and Pneumonia. *Clin Infect Dis.* 1999 Nov 1;29(5):1128–32.
- 645 54. Moran GJ, Krishnadasan A, Gorwitz RJ, Fosheim GE, McDougal LK, Carey RB, et al.  
646 Methicillin-Resistant S. aureus Infections among Patients in the Emergency Department.  
647 *N Engl J Med.* 2006 Aug 17;355(7):666–74.
- 648 55. Mason A, Foster D, Bradley P, Golubchik T, Doumith M, Gordon NC, et al. Accuracy of  
649 Different Bioinformatics Methods in Detecting Antibiotic Resistance and Virulence Factors  
650 from Staphylococcus aureus Whole-Genome Sequences. *J Clin Microbiol.* 2018  
651 Sep;56(9):e01815-17.
- 652 56. Sola C, Paganini H, Egea AL, Moyano AJ, Garnero A, Kevric I, et al. Spread of epidemic  
653 MRSA-ST5-IV clone encoding PVL as a major cause of community onset staphylococcal  
654 infections in Argentinean children. *PloS One.* 2012;7(1):e30487.
- 655 57. Kawaguchiya M, Urushibara N, Yamamoto D, Yamashita T, Shinagawa M, Watanabe N, et  
656 al. Characterization of PVL/ACME-positive methicillin-resistant Staphylococcus aureus  
657 (genotypes ST8-MRSA-IV and ST5-MRSA-II) isolated from a university hospital in Japan.  
658 *Microb Drug Resist Larchmt N.* 2013 Feb;19(1):48–56.

- 659 58. Jiménez JN, Ocampo AM, Vanegas JM, Rodriguez EA, Mediavilla JR, Chen L, et al. CC8  
660 MRSA Strains Harboring SCCmec Type IVc are Predominant in Colombian Hospitals.  
661 PLoS ONE. 2012 Jun 20;7(6):e38576.
- 662 59. Niek WK, Teh CSJ, Idris N, Thong KL, Ponnampalavanar S. Predominance of ST22-MRSA-  
663 IV Clone and Emergence of Clones for Methicillin-Resistant *Staphylococcus aureus*  
664 Clinical Isolates Collected from a Tertiary Teaching Hospital Over a Two-Year Period. *Jpn*  
665 *J Infect Dis*. 2019 Jul 24;72(4):228–36.
- 666 60. Horváth A, Dobay O, Sahin-Tóth J, Juhász E, Pongrácz J, Iván M, et al. Characterisation of  
667 antibiotic resistance, virulence, clonality and mortality in MRSA and MSSA bloodstream  
668 infections at a tertiary-level hospital in Hungary: a 6-year retrospective study. *Ann Clin*  
669 *Microbiol Antimicrob*. 2020 May 7;19(1):17.
- 670 61. Silva V, Ribeiro J, Rocha J, Manaia CM, Silva A, Pereira JE, et al. High Frequency of the  
671 EMRSA-15 Clone (ST22-MRSA-IV) in Hospital Wastewater. *Microorganisms*. 2022 Jan  
672 11;10(1):147.
- 673 62. Miragaia M, Thomas JC, Couto I, Enright MC, de Lencastre H. Inferring a population  
674 structure for *Staphylococcus epidermidis* from multilocus sequence typing data. *J Bacteriol*.  
675 2007 Mar;189(6):2540–52.
- 676 63. Fessler AT, Billerbeck C, Kadlec K, Schwarz S. Identification and characterization of  
677 methicillin-resistant coagulase-negative staphylococci from bovine mastitis. *J Antimicrob*  
678 *Chemother*. 2010 Aug;65(8):1576–82.
- 679 64. Andrews S. FastQC: a quality control tool for high throughput sequence data. Babraham  
680 Bioinformatics, Babraham Institute, Cambridge, United Kingdom; 2010.
- 681 65. Segata N, Waldron L, Ballarini A, Narasimhan V, Jousson O, Huttenhower C. Metagenomic  
682 microbial community profiling using unique clade-specific marker genes. *Nat Methods*.  
683 2012 Aug;9(8):811–4.
- 684 66. Wick RR, Judd LM, Gorrie CL, Holt KE. Unicycler: Resolving bacterial genome assemblies  
685 from short and long sequencing reads. *PLOS Comput Biol*. 2017 Jun 8;13(6):e1005595.
- 686 67. Mikheenko A, Prjibelski A, Saveliev V, Antipov D, Gurevich A. Versatile genome assembly  
687 evaluation with QUAST-LG. *Bioinformatics*. 2018 Jul 1;34(13):i142–50.
- 688 68. Seth-Smith HMB, Bonfiglio F, Cuénod A, Reist J, Egli A, Wüthrich D. Evaluation of Rapid  
689 Library Preparation Protocols for Whole Genome Sequencing Based Outbreak  
690 Investigation. *Front Public Health* [Internet]. 2019 [cited 2022 Nov 12];7. Available from:  
691 <https://www.frontiersin.org/articles/10.3389/fpubh.2019.00241>
- 692 69. EUCAST: Previous versions of documents [Internet]. [cited 2021 Jun 25]. Available from:  
693 [https://www.eucast.org/ast\\_of\\_bacteria/previous\\_versions\\_of\\_documents/](https://www.eucast.org/ast_of_bacteria/previous_versions_of_documents/)
- 694 70. De Coster W, D’Hert S, Schultz DT, Cruts M, Van Broeckhoven C. NanoPack: visualizing  
695 and processing long-read sequencing data. *Bioinformatics*. 2018 Aug 1;34(15):2666–9.
- 696 71. Wick R. Table of contents [Internet]. 2022 [cited 2022 Nov 12]. Available from:  
697 <https://github.com/rrwick/Porechop>
- 698 72. Wick R. *rrwick/Filtlong* [Internet]. 2022 [cited 2022 Nov 12]. Available from:  
699 <https://github.com/rrwick/Filtlong>

- 700 73. Kolmogorov M, Yuan J, Lin Y, Pevzner PA. Assembly of long, error-prone reads using repeat  
701 graphs. *Nat Biotechnol.* 2019 May;37(5):540–6.
- 702 74. Racon [Internet]. Laboratory for Bioinformatics and Computational Biology; 2022 [cited 2022  
703 Nov 12]. Available from: <https://github.com/lbcb-sci/racon>
- 704 75. Medaka [Internet]. Oxford Nanopore Technologies; 2022 [cited 2022 Nov 12]. Available  
705 from: <https://github.com/nanoporetech/medaka>
- 706 76. Wick RR, Holt KE. Polypolish: Short-read polishing of long-read bacterial genome  
707 assemblies. *PLOS Comput Biol.* 2022 Jan 24;18(1):e1009802.
- 708 77. Home - Pathogen Detection - NCBI [Internet]. [cited 2021 May 26]. Available from:  
709 <https://www.ncbi.nlm.nih.gov/pathogens/>
- 710 78. Pathogenwatch | A Global Platform for Genomic Surveillance [Internet]. [cited 2021 Jun 14].  
711 Available from: <https://pathogen.watch/>
- 712 79. Argimón S, Yeats CA, Goater RJ, Abudahab K, Taylor B, Underwood A, et al. A global  
713 resource for genomic predictions of antimicrobial resistance and surveillance of *Salmonella*  
714 *Typhi* at Pathogenwatch. *bioRxiv.* 2020 Jul 3;2020.07.03.186692.
- 715 80. Coolors - The super fast color schemes generator! [Internet]. Coolors.co. [cited 2021 Jul 14].  
716 Available from: <https://coolors.co/>
- 717 81. Wick R. Assembly Dereplicator [Internet]. 2022 [cited 2022 Nov 12]. Available from:  
718 <https://github.com/rrwick/Assembly-Dereplicator>
- 719 82. Seemann T. Prokka: rapid prokaryotic genome annotation. *Bioinforma Oxf Engl.* 2014 Jul  
720 15;30(14):2068–9.
- 721 83. Minh BQ, Schmidt HA, Chernomor O, Schrempf D, Woodhams MD, von Haeseler A, et al.  
722 IQ-TREE 2: New Models and Efficient Methods for Phylogenetic Inference in the Genomic  
723 Era. *Mol Biol Evol.* 2020 May 1;37(5):1530–4.
- 724 84. Harris SR. SKA: Split Kmer Analysis Toolkit for Bacterial Genomic Epidemiology [Internet].  
725 *bioRxiv*; 2018 [cited 2022 Nov 12]. p. 453142. Available from:  
726 <https://www.biorxiv.org/content/10.1101/453142v1>
- 727 85. Croucher NJ, Page AJ, Connor TR, Delaney AJ, Keane JA, Bentley SD, et al. Rapid  
728 phylogenetic analysis of large samples of recombinant bacterial whole genome sequences  
729 using Gubbins. *Nucleic Acids Res.* 2015 Feb 18;43(3):e15.
- 730 86. Didelot X. BactDating: Bayesian inference of ancestral dates on bacterial phylogenetic trees  
731 [Internet]. 2022. Available from: <https://github.com/xavierdidelot/BactDating>
- 732 87. Tonkin-Hill G, Lees JA, Bentley SD, Frost SDW, Corander J. Fast hierarchical Bayesian  
733 analysis of population structure. *Nucleic Acids Res.* 2019 Jun 20;47(11):5539–49.
- 734 88. Bortolaia V, Kaas RS, Ruppe E, Roberts MC, Schwarz S, Cattoir V, et al. ResFinder 4.0 for  
735 predictions of phenotypes from genotypes. *J Antimicrob Chemother.* 2020 Dec  
736 1;75(12):3491–500.
- 737 89. Joensen KG, Scheutz F, Lund O, Hasman H, Kaas RS, Nielsen EM, et al. Real-time whole-  
738 genome sequencing for routine typing, surveillance, and outbreak detection of  
739 verotoxigenic *Escherichia coli*. *J Clin Microbiol.* 2014 May;52(5):1501–10.

- 740 90. L C, J Y, J Y, Z Y, L S, Y S, et al. VFDB: a reference database for bacterial virulence factors.  
741 Nucleic Acids Res [Internet]. 2005 Jan 1 [cited 2021 Jul 6];33(Database issue). Available  
742 from: <https://pubmed.ncbi.nlm.nih.gov/15608208/>
- 743 91. UniProt Consortium. UniProt: the universal protein knowledgebase in 2021. Nucleic Acids  
744 Res. 2021 Jan 8;49(D1):D480–9.
- 745 92. Kaya H, Hasman H, Larsen J, Stegger M, Johannesen TB, Allesøe RL, et al.  
746 SCCmecFinder, a Web-Based Tool for Typing of Staphylococcal Cassette Chromosome  
747 mec in *Staphylococcus aureus* Using Whole-Genome Sequence Data. mSphere. 2018  
748 Feb;3(1).
- 749 93. Rinker TW, Kurkiewicz D. pacman: Package Management for R [Internet]. Buffalo, New  
750 York; 2018. Available from: <http://github.com/trinker/pacman>
- 751 94. Wickham H, Averick M, Bryan J, Chang W, McGowan L, François R, et al. Welcome to the  
752 Tidyverse. J Open Source Softw. 2019 Nov 21;4(43):1686.
- 753 95. Couture-Beil A. rjson: JSON for R [Internet]. 2018. Available from: [https://CRAN.R-](https://CRAN.R-project.org/package=rjson)  
754 [project.org/package=rjson](https://CRAN.R-project.org/package=rjson)
- 755 96. Yu G, Smith D, Zhu H, Guan Y, Lam TTY. ggtree: an R package for visualization and  
756 annotation of phylogenetic trees with their covariates and other associated data. Methods  
757 Ecol Evol. 2017;8(1):28–36.
- 758 97. Wang LG, Lam TTY, Xu S, Dai Z, Zhou L, Feng T, et al. treeio: an R package for phylogenetic  
759 tree input and output with richly annotated and associated data. Mol Biol Evol.  
760 2020;37(2):599–603.
- 761 98. Yu G. tidytree: A Tidy Tool for Phylogenetic Tree Data Manipulation [Internet]. 2021.  
762 Available from: <https://yulab-smu.top/treedata-book/>
- 763 99. Paradis E, Schliep K. ape 5.0: an environment for modern phylogenetics and evolutionary  
764 analyses in R. Bioinformatics. 2019;35:526–8.
- 765 100. Gohel D. flextable: Functions for Tabular Reporting [Internet]. 2021. Available from:  
766 <https://CRAN.R-project.org/package=flextable>
- 767 101. Wickham H, Henry L, Pedersen TL, Luciani TJ, Decorde M, Lise V. svglite: An SVG Graphics  
768 Device [Internet]. 2022. Available from: <https://CRAN.R-project.org/package=svglite>
- 769 102. Xie Y. knitr: A General-Purpose Package for Dynamic Report Generation in R [Internet].  
770 2022. Available from: <https://yihui.org/knitr/>

771  
772

773

## 774 Glossary

775 MRSA = methicillin resistant *Staphylococcus aureus*

- 776 MSSA = methicillin sensitive *Staphylococcus aureus*
- 777 HA-MRSA = hospital-associated MRSA
- 778 CA-MRSA = community-associated MRSA
- 779 LA-MRSA = livestock-associated MRSA
- 780 CCoS = Culture Collection of Switzerland
- 781 USB = University Hospital Basel
- 782 MLST = multilocus sequence type
- 783 cgMLST = core genome multilocus sequence type
- 784 ST = sequence type
- 785 CC = clonal complex
- 786 SLV = single locus variant
- 787 CI = confidence interval



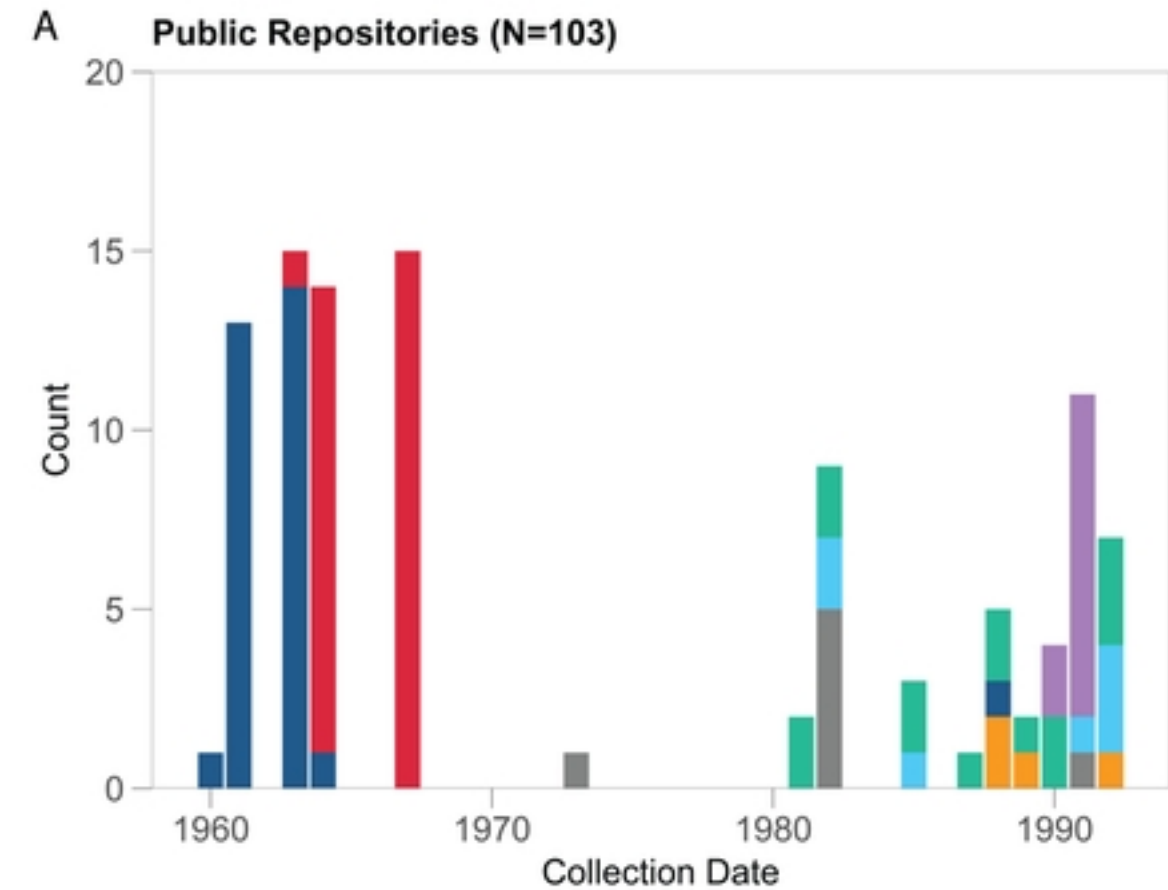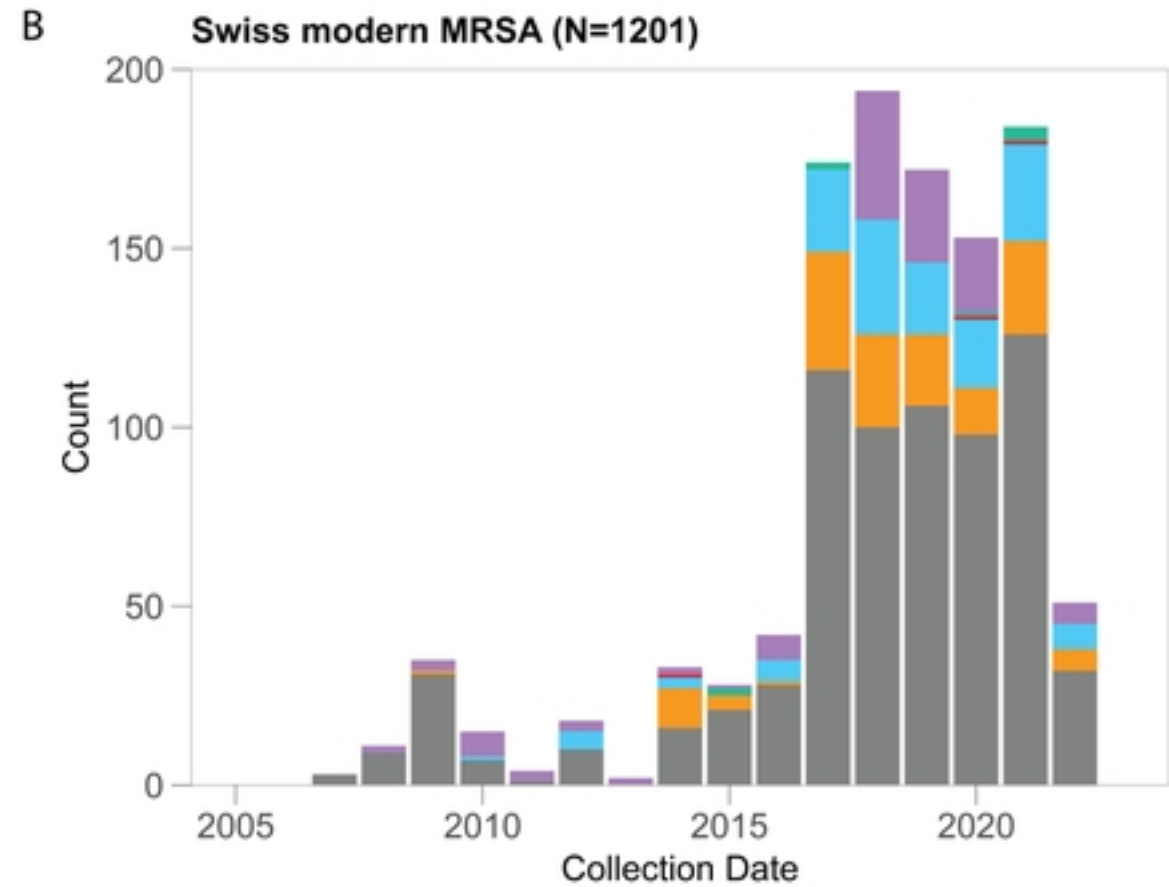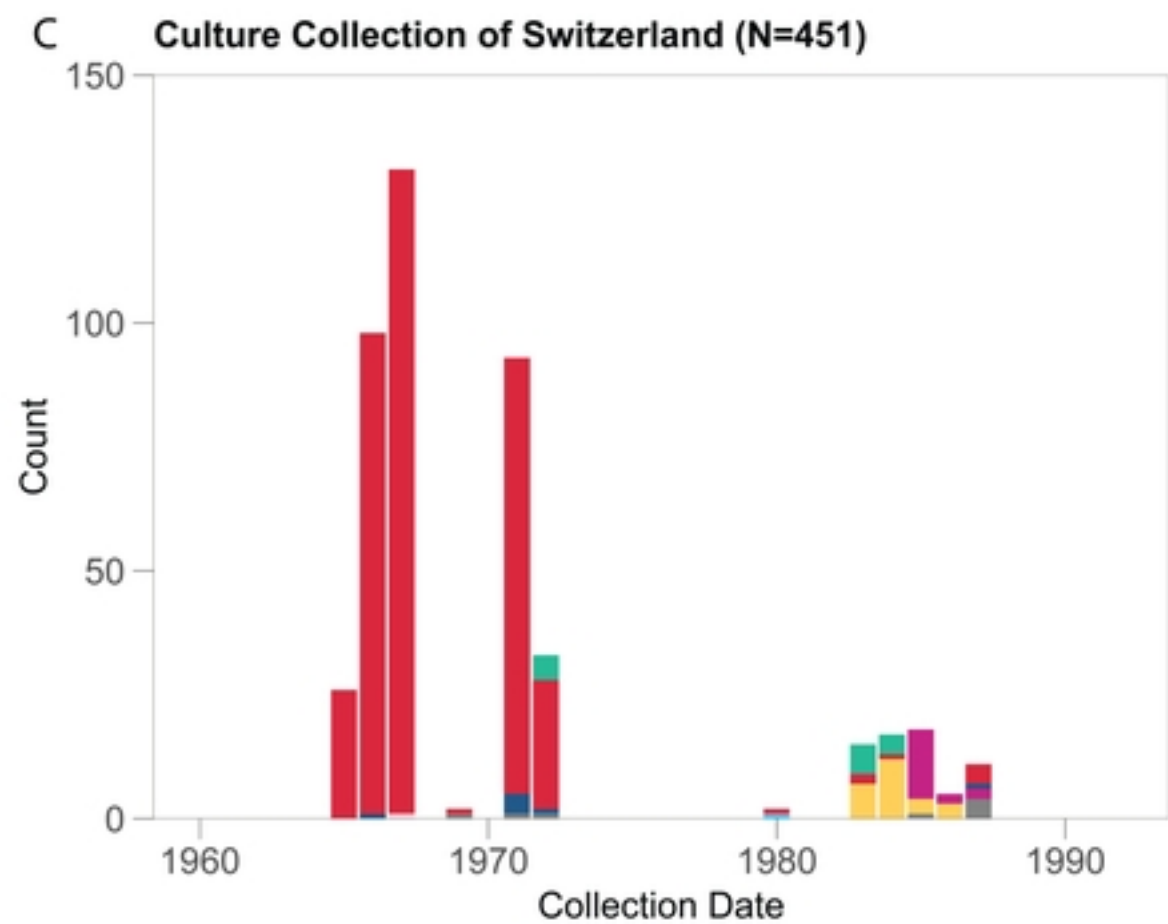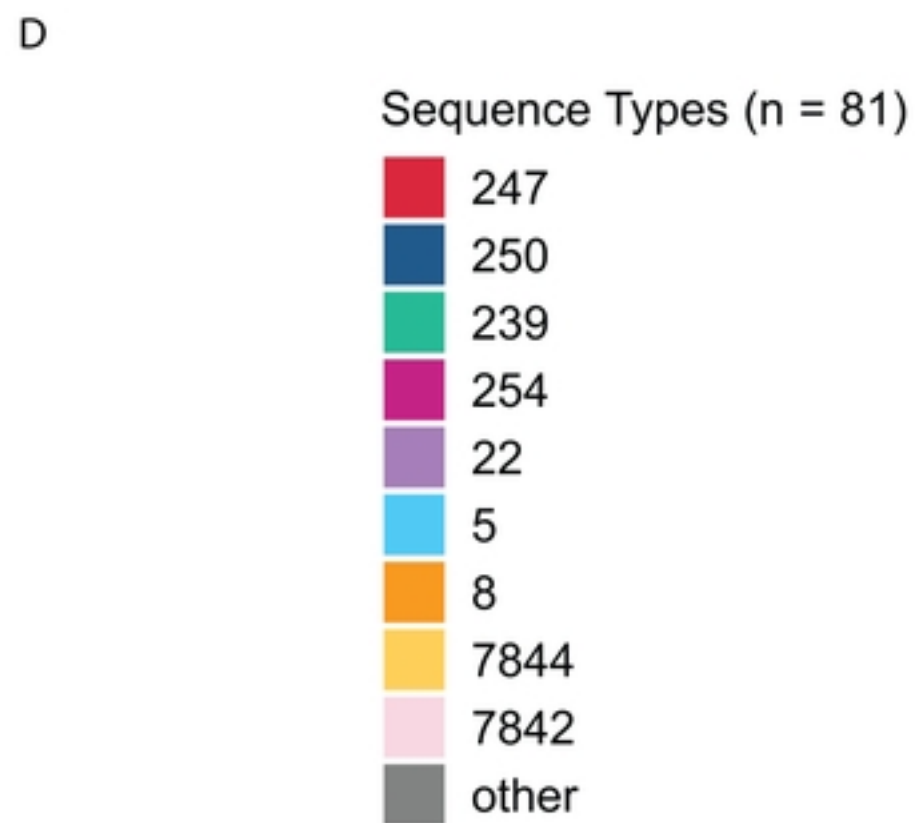



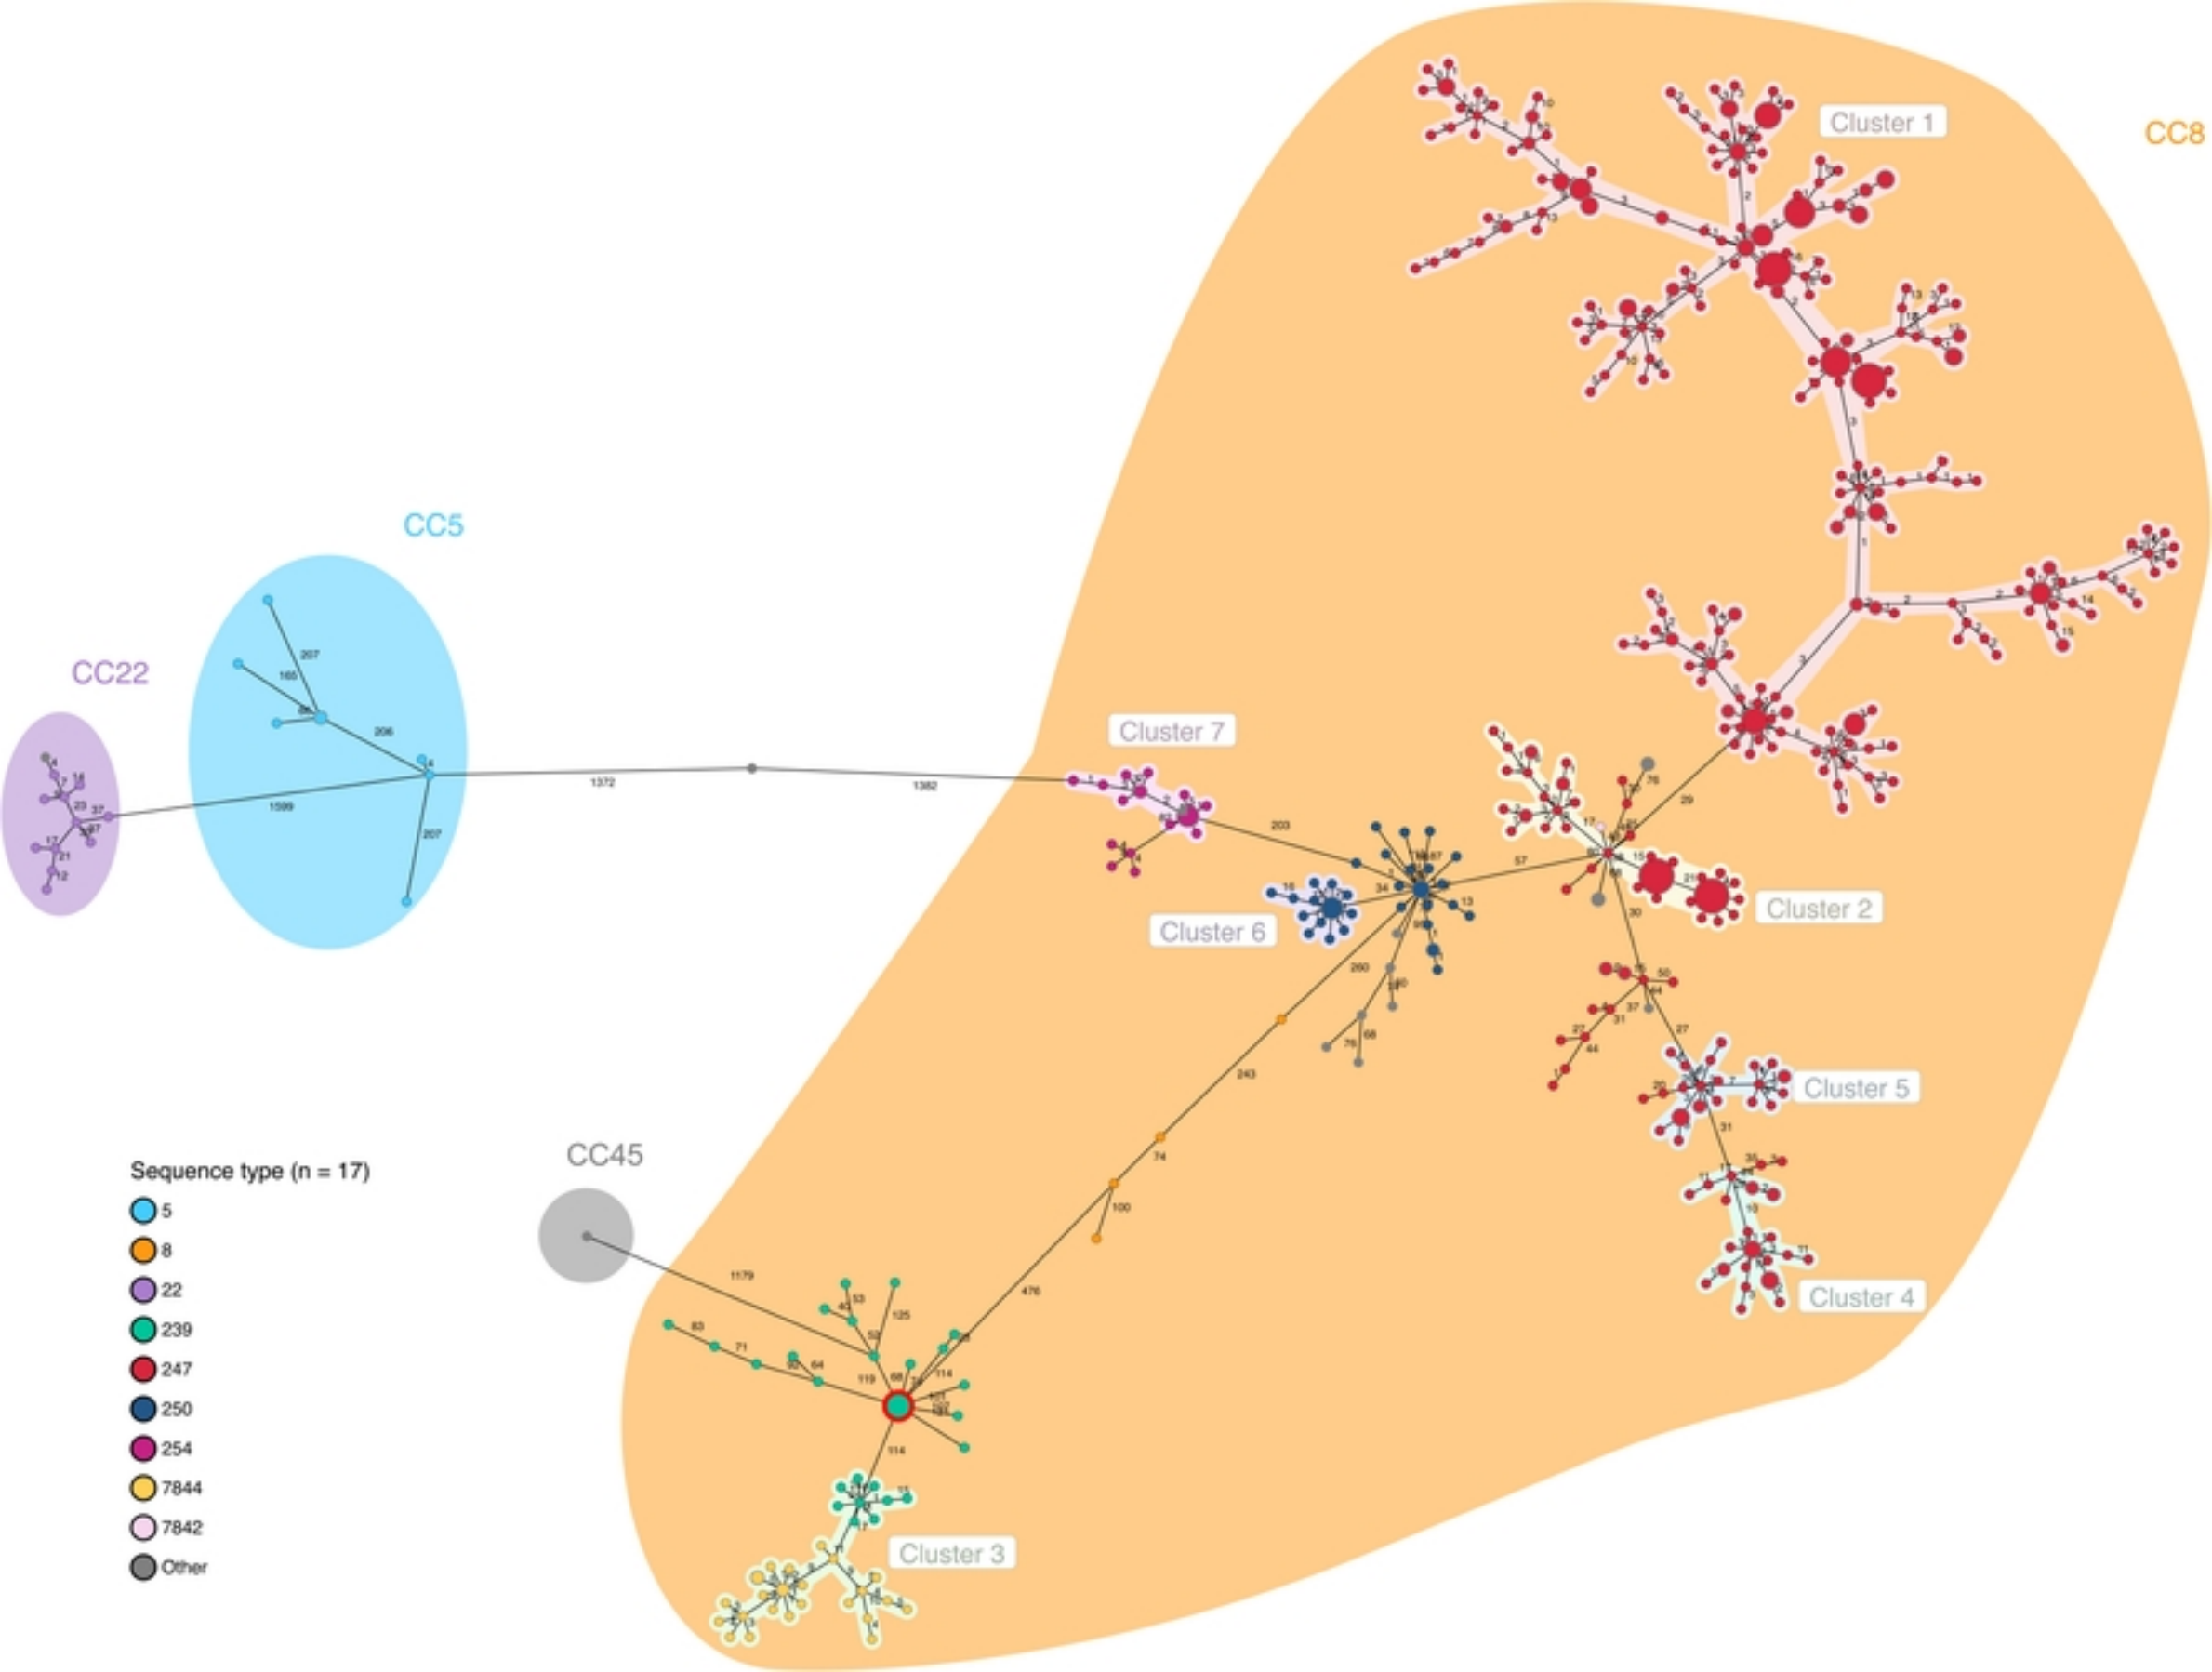

bioRxiv preprint doi: <https://doi.org/10.1101/2023.04.27.538514>; this version posted April 27, 2023. The copyright holder for this preprint (which was not certified by peer review) is the author/funder, who has granted bioRxiv a license to display the preprint in perpetuity. It is made available under aCC-BY 4.0 International license.

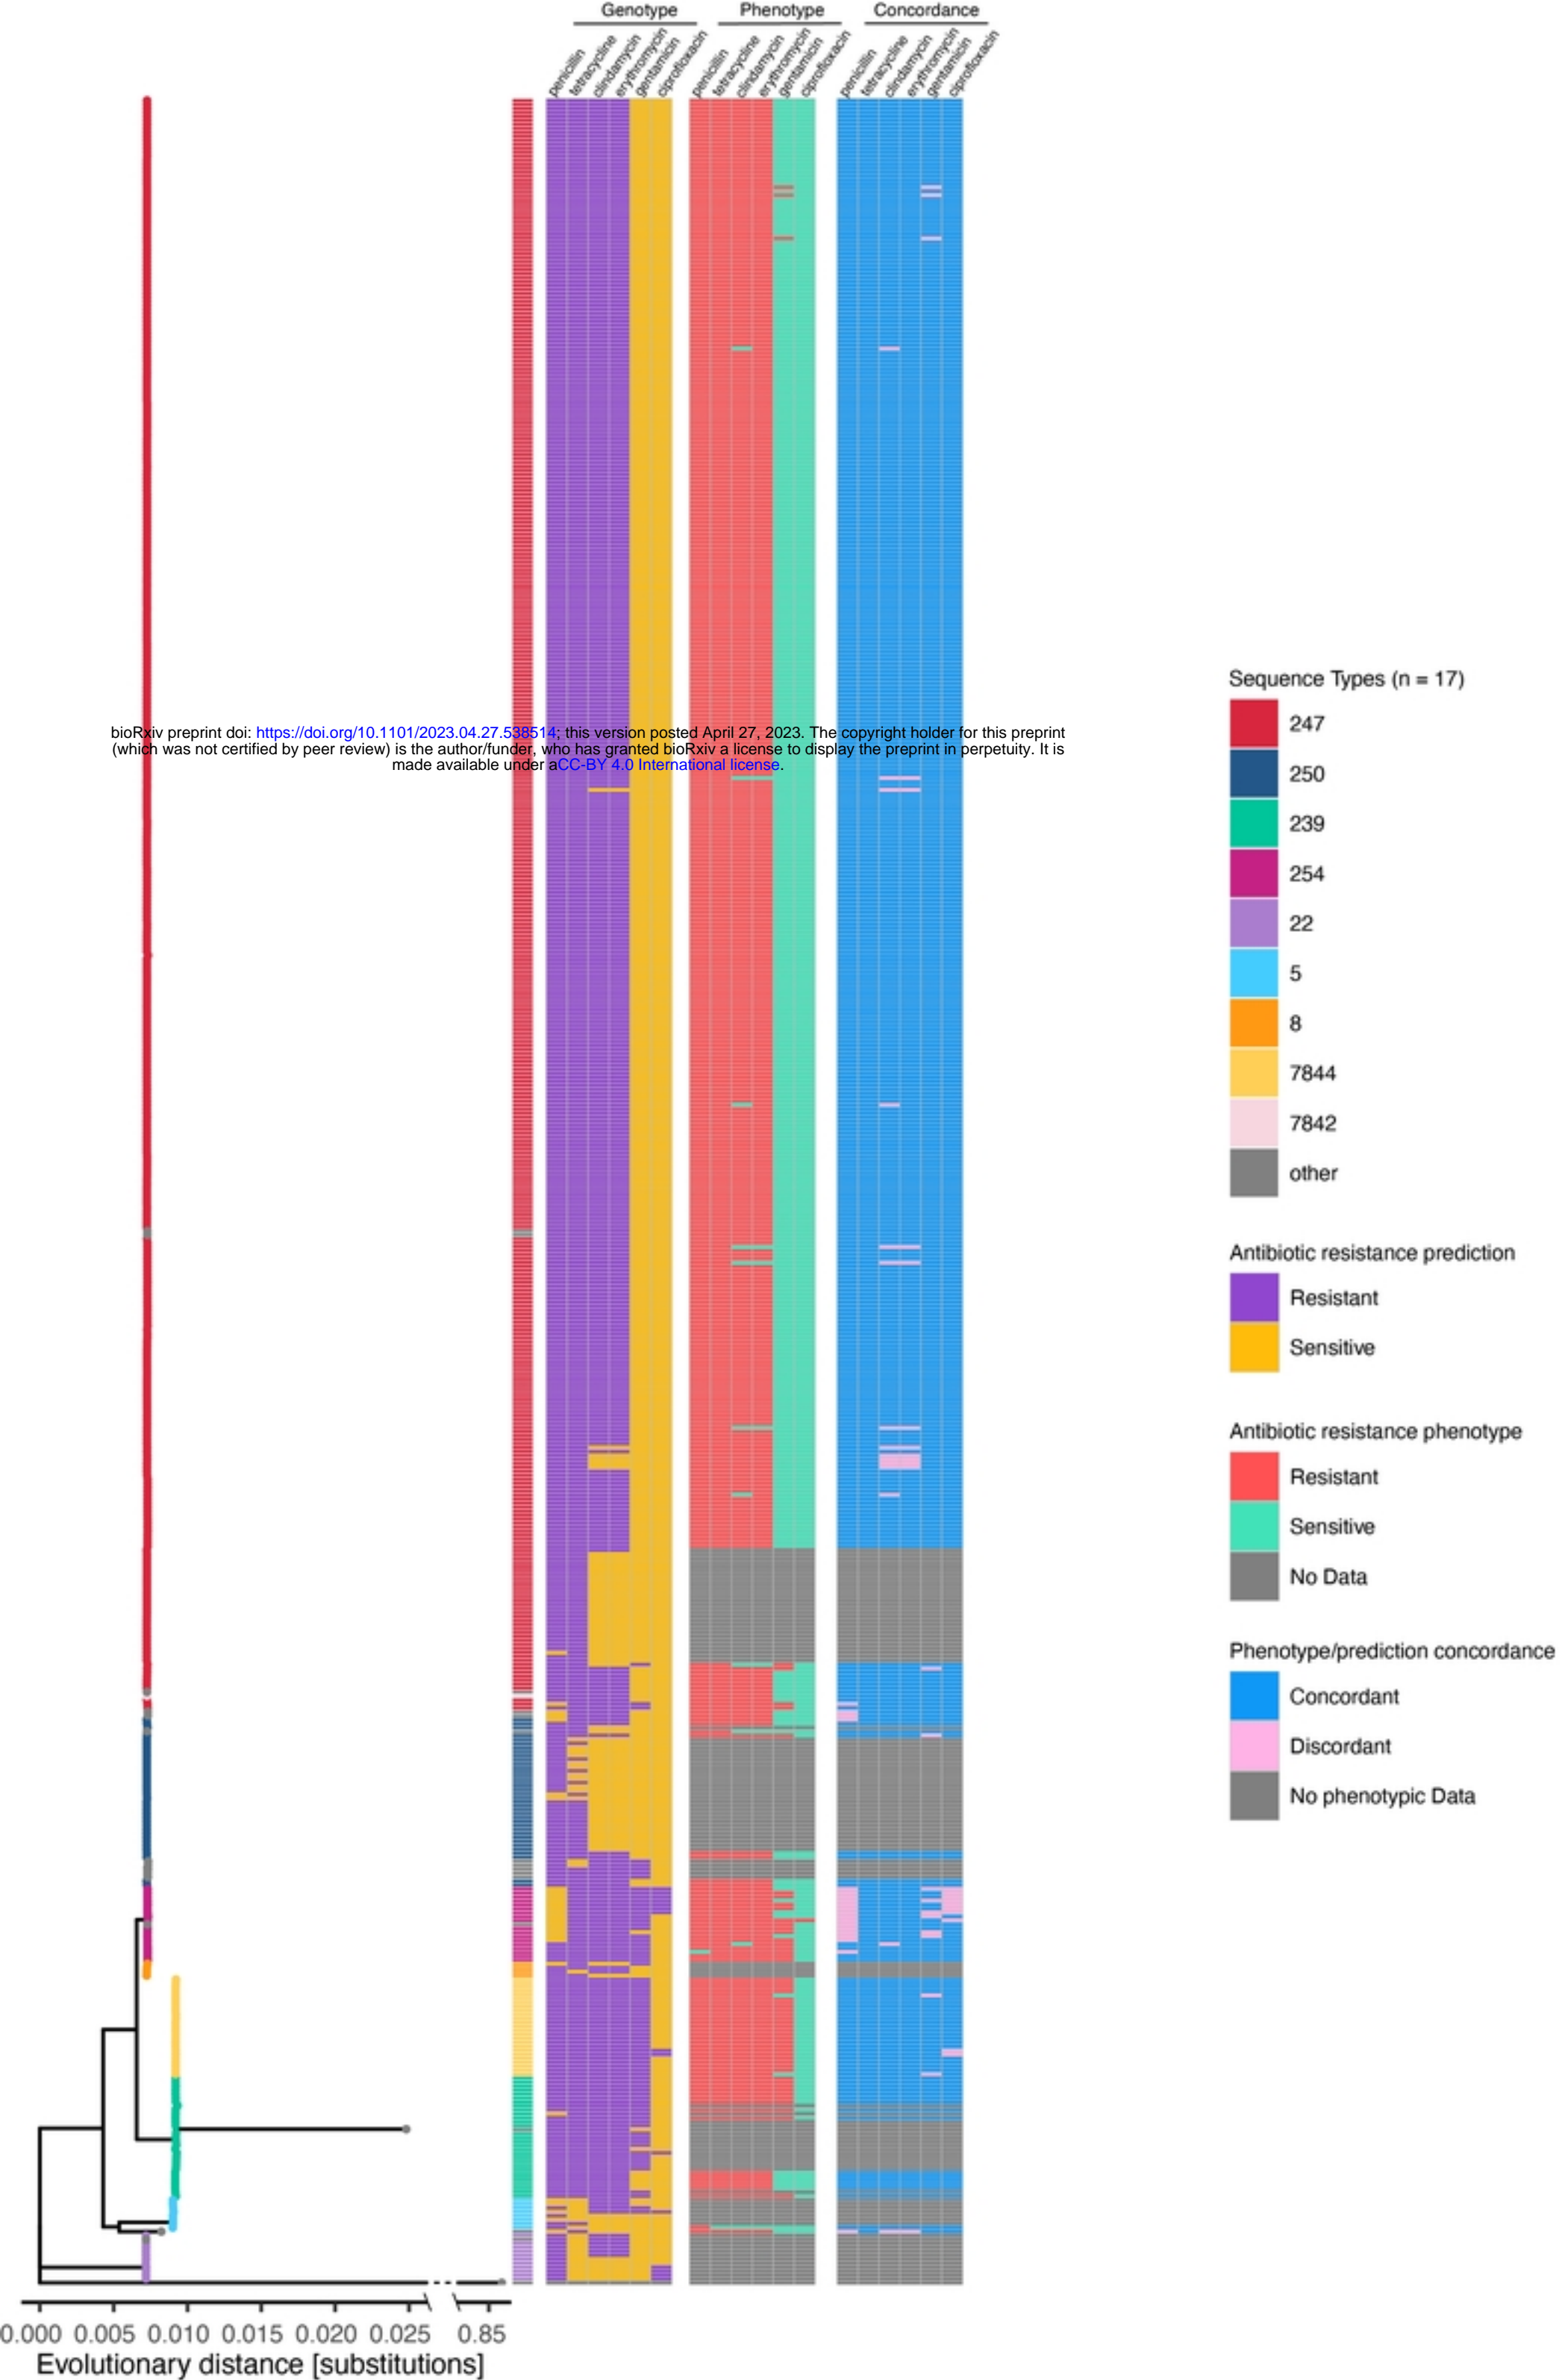

bioRxiv preprint doi: <https://doi.org/10.1101/2023.04.27.538514>; this version posted April 27, 2023. The copyright holder for this preprint (which was not certified by peer review) is the author/funder, who has granted bioRxiv a license to display the preprint in perpetuity. It is made available under aCC-BY 4.0 International license.

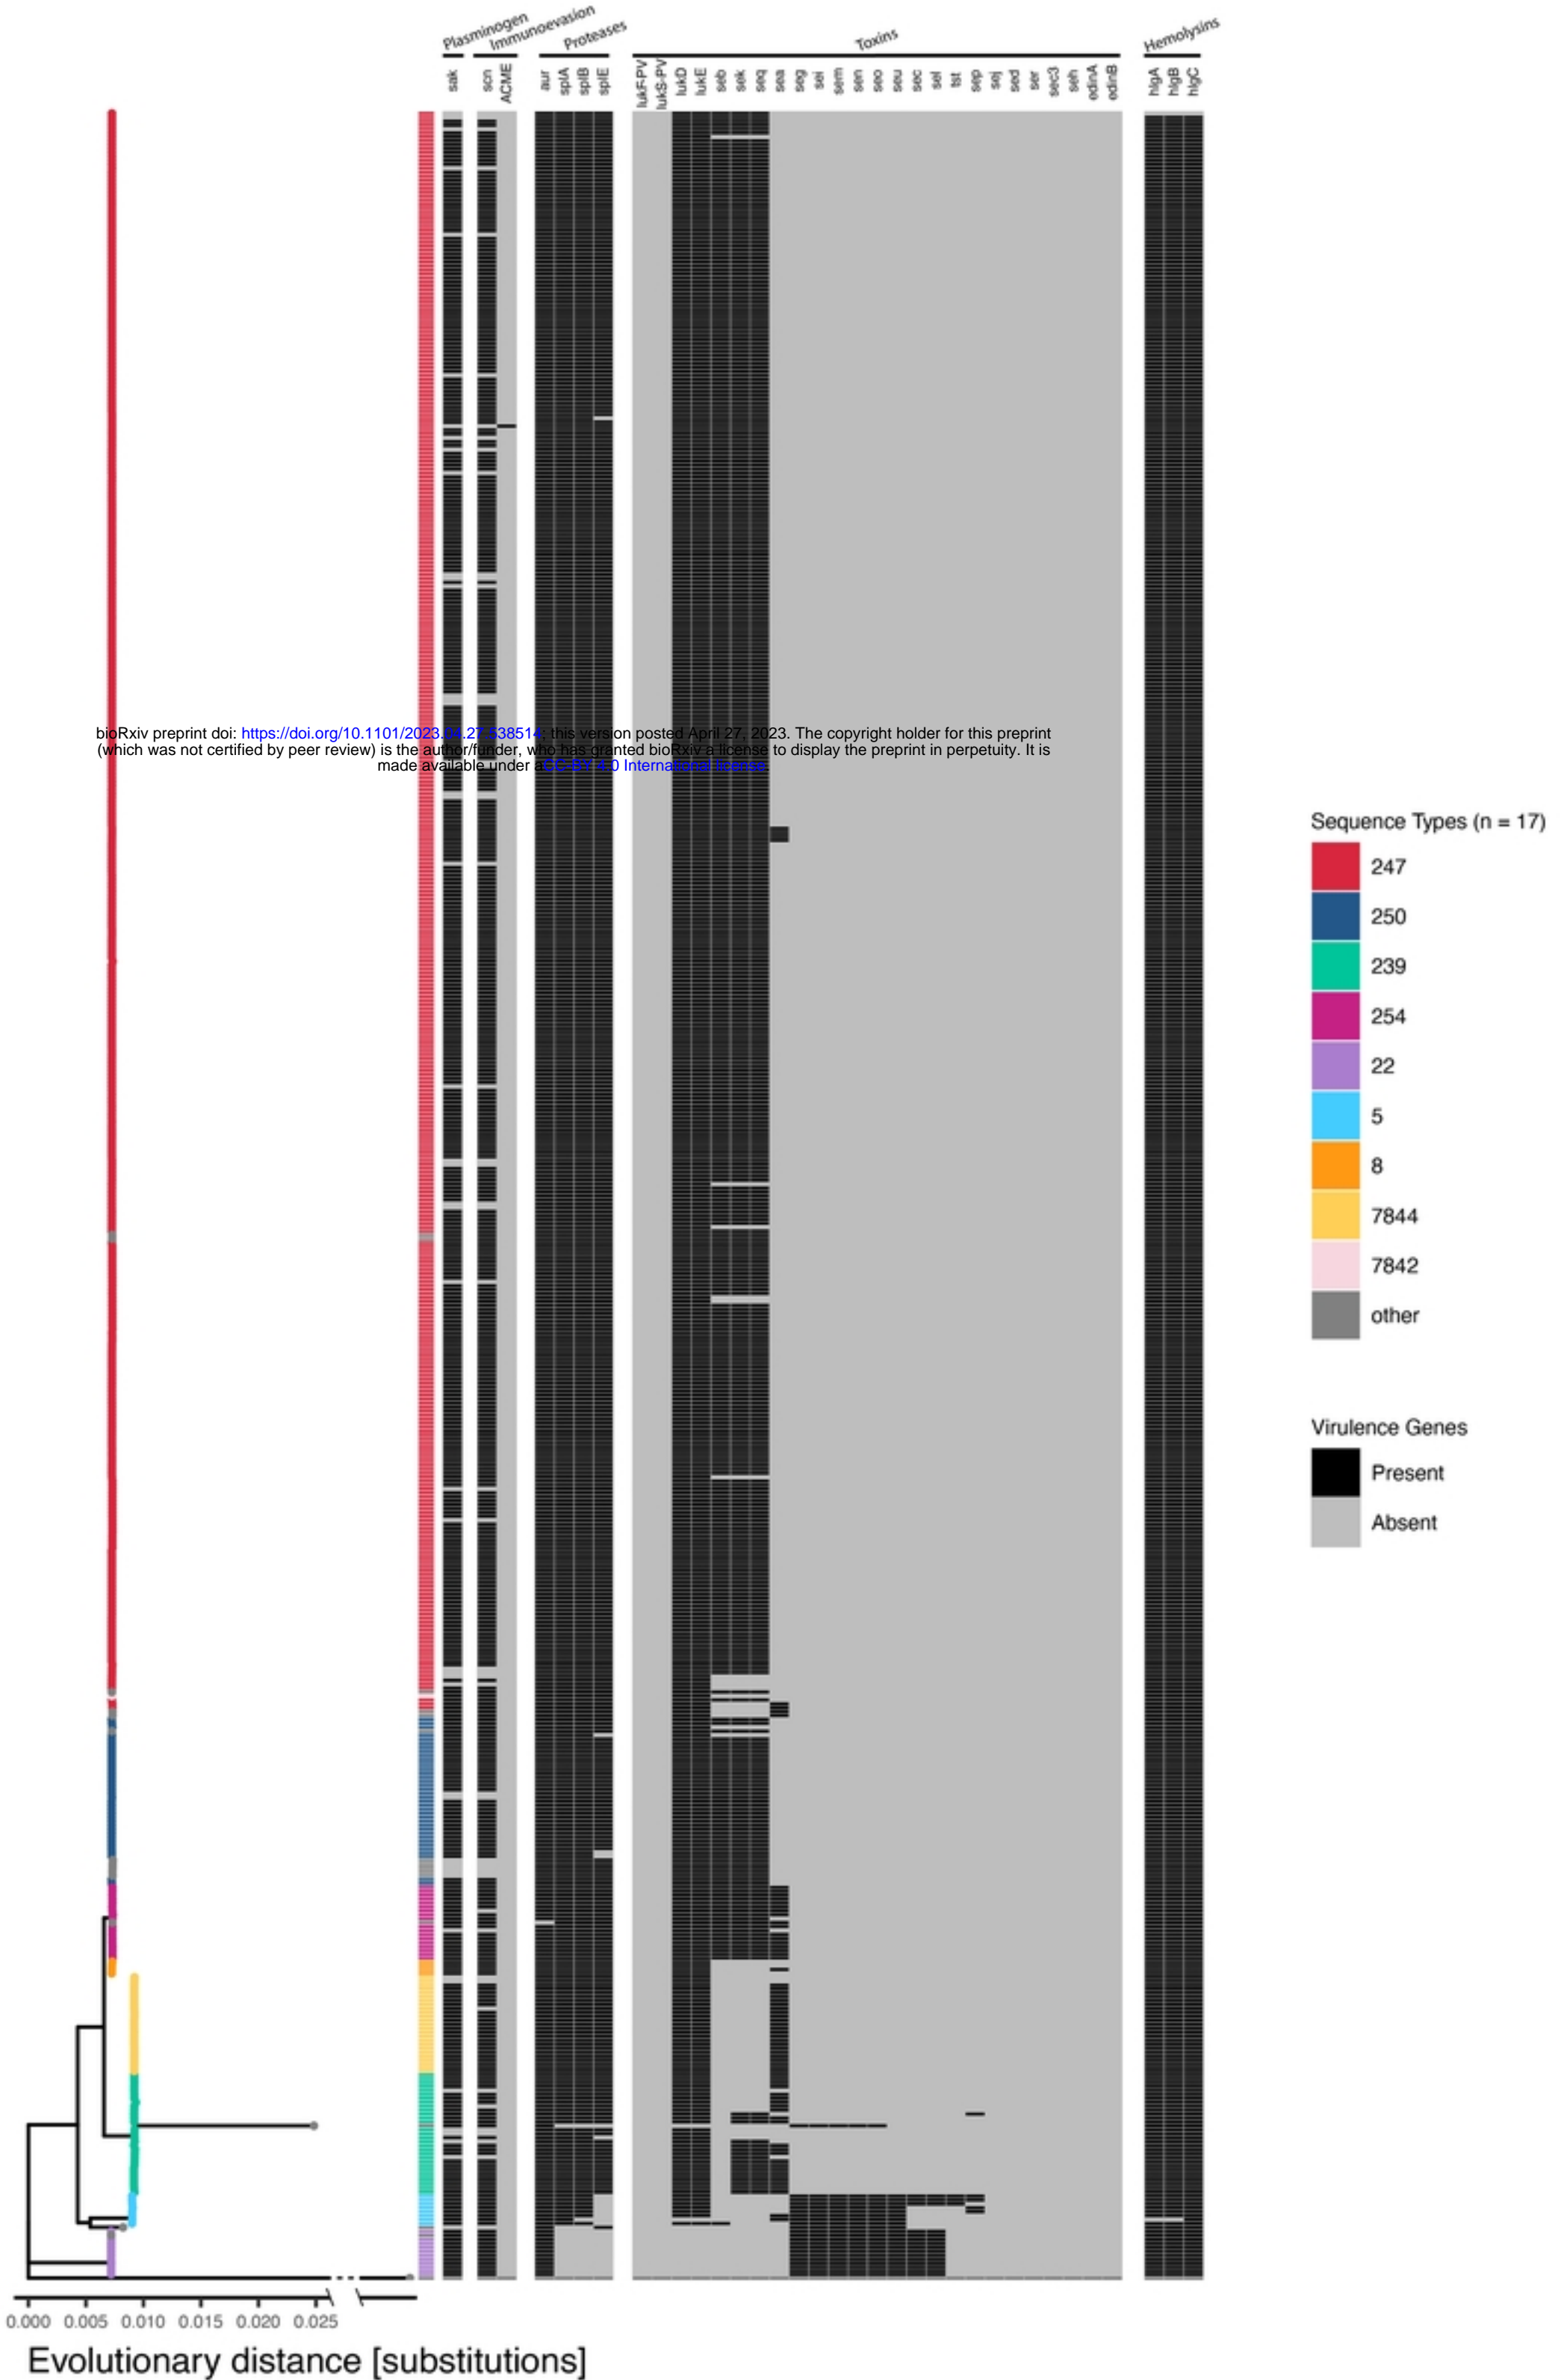

Source: https://www.biorxiv.org/content/10.1101/2023.04.27.538514v1.full.pdf
